1           **The mouse HP1 proteins are essential for preventing liver tumorigenesis**

2

3

4   Nehmé Saksouk<sup>1-4\*</sup>, Shefqet Hajdari<sup>1-4\*</sup>, Marine Pratlong<sup>5</sup>, Célia Barrachina<sup>5</sup>, Céline Graber<sup>6</sup>,  
5   Aliko Zavoriti<sup>1-4</sup>, Amélie Sarrazin<sup>6</sup>, Nelly Pirot<sup>1-4</sup>, Jean-Yohan Noël<sup>1-4</sup>, Lakhdar Khellaf<sup>4</sup>, Eric  
6   Fabbrizio<sup>1-4, 7</sup>, Eric Julien<sup>1-4, 7</sup>, Florence M. Cammas<sup>1-4, 7</sup>

7

8   <sup>1</sup> IRCM, Institut de Recherche en Cancérologie de Montpellier, Montpellier, F-34298, France.

9   <sup>2</sup> INSERM, U1194, Montpellier, F-34298, France.

10   <sup>3</sup> Université de Montpellier, Montpellier, F-34090, France.

11   <sup>4</sup> Institut régional du Cancer de Montpellier, Montpellier, F-34298, France.

12   <sup>5</sup> MGX, Biocampus Montpellier, CNRS, INSERM, Univ Montpellier, Montpellier, France

13   <sup>6</sup> IGBMC, Institut de Génétique, de Biologie Moléculaire et Cellulaire, Illkirch, France

14   <sup>7</sup> MRI, BioCampus Montpellier, CNRS, INSERM, Univ Montpellier, Montpellier, France

15   <sup>8</sup> CNRS, Route de Mende, Montpellier, France

16

17   Corresponding author: Florence Cammas, [Florence.cammas@inserm.fr](mailto:Florence.cammas@inserm.fr)

18

19   \* Contributed equally to the work

20 **Abstract**

21 Chromatin organization is essential for appropriate interpretation of the genetic information.  
22 Here, we demonstrated that the chromatin associated proteins HP1 are dispensable for cell  
23 survival but are essential within hepatocytes to prevent liver tumor development. Molecular  
24 characterization of pre-malignant HP1-Triple KO livers revealed that HP1 are required for  
25 maintenance of the H3K9me3 and H4K20me3 heterochromatin marks but not for overall  
26 genome stability nor for the expression of major satellites. HP1-TKO livers are also  
27 characterized by inappropriate expression of many genes involved in crucial liver functions  
28 such as regulation of the redox and endoplasmic reticulum equilibrium, lipid metabolism and  
29 steroid biosynthesis. Finally, we showed that some of these genes were over-expressed  
30 through the reactivation of specific endogenous retrovirus, most likely through the  
31 inactivation of the KRAB-ZFP/TRIM28 axis. Our findings indicate that HP1 proteins act as  
32 guardians of liver homeostasis to prevent tumor development through the modulation of  
33 multiple chromatin-associated events.

34 **Keywords:** chromatin; HP1; cancer; liver; transcriptional silencing; endogenous retrovirus;  
35 oxidative stress

36

37

## 38 Introduction

39 Chromatin dynamic organization is essential for the interpretation of genetic information  
40 in a cell-type and tissue-specific manner (Prakash and Fournier, 2018). Alteration of this  
41 organization can have devastating consequences, as evidenced by the large number of  
42 diseases induced by mutations in chromatin-associated proteins (Koschmann et al., 2017;  
43 Mirabella et al., 2016), as well as by the dramatic changes in chromatin organization  
44 observed in cancer cells (Mai, 2018). Although extensively studied in the past three decades,  
45 it is still largely unknown how chromatin organization is regulated and involved in whole  
46 organism homeostasis.

47 Chromatin can be divided according to its structural and functional features in  
48 euchromatin and heterochromatin. Euchromatin displays low level of compaction, is highly  
49 enriched in genes, and is transcriptionally competent. Conversely heterochromatin is highly  
50 compacted, enriched in repetitive DNA sequences, and mostly silent. Although,  
51 heterochromatin was considered for a long time as an inert compartment with the single  
52 function of silencing parasite DNA sequences, it is now recognized as a dynamic and  
53 functional compartment (Janssen et al., 2018a). Heterochromatin Protein 1 (HP1) proteins  
54 were first isolated as major heterochromatin components in *Drosophila* (James and Elgin,  
55 1986). These proteins are highly conserved from yeast to mammals which express three  
56 isoforms (HP1 $\alpha$ , HP1 $\beta$  and HP1 $\gamma$ ) that are distributed in both eu- and heterochromatin.  
57 These proteins are characterized by a N-terminal chromodomain (CD), which is involved in  
58 the recognition of the heterochromatin-associated histone marks H3 lysine-9 di- or  
59 trimethylated (H3K9me<sub>2/3</sub>), and a C-terminal chromoshadow domain (CSD), which, through  
60 dimerization, constitutes a platform for interaction with many protein partners. These two  
61 domains are separated by the hinge domain that is crucial for HP1 association with RNA and  
62 recruitment to heterochromatin (Eissenberg and Elgin, 2014; Lomberk et al., 2006). Thus,  
63 HP1 proteins, through this structural organization, are at the crossroads of the structural and  
64 functional organization of chromatin. Accordingly, HP1 are important for heterochromatin

65 silencing, chromosome segregation, regulation of gene expression, DNA repair and DNA  
66 replication (Dinant and Luijsterburg, 2009; Fanti and Pimpinelli, 2008; Nishibuchi and  
67 Nakayama, 2014). Functionally, HP1 proteins are essential for embryonic development in  
68 several organisms, including *Drosophila* (Eissenberg et al., 1992), *C. elegans* (Schott et al.,  
69 2006) and the mouse (our unpublished data). HP1 $\alpha$  is essential for the plasticity of T helper  
70 (Th2) lymphocytes (Allan et al., 2012), HP1 $\beta$  for neuro-muscular junctions (Aucott et al.,  
71 2008) and HP1 $\gamma$  for spermatogenesis (Abe et al., 2011; Brown et al., 2010). Several studies  
72 also suggested a correlation between the level of HP1 expression and cancer development  
73 and/or metastasis; however, how HP1 are involved in these processes remains largely to be  
74 clarified (Dialynas et al., 2008; Vad-Nielsen and Nielsen, 2015).

75 Liver chromatin organization has been well characterized in several physio-  
76 pathological conditions (Janssen et al., 2018b). In addition, several known HP1 partners,  
77 including the transcription cofactors TRIM24 and TRIM28, and the histone-lysine N-  
78 methyltransferase SUV39H1, play key roles in hepatocytes. Therefore, hepatocytes  
79 constitute an excellent model to investigate HP1 roles in chromatin functions (Bojkowska et  
80 al., 2012a; Fan et al., 2013; Hardy and Mann, 2016; Herquel et al., 2011; Khetchoumian et  
81 al., 2007). We therefore decided to inactivate all HP1 encoding genes specifically in mouse  
82 hepatocytes (HP1-TKO mice). Unexpectedly, we found that HP1-TKO hepatocytes can  
83 survive and contribute to liver functions throughout life but HP1-TKO animals developed liver  
84 tumors at old age. Coupled with our molecular analysis, these data highlighted a new  
85 function of HP1 proteins as guardians of liver homeostasis through the modulation of various  
86 chromatin-associated events including maintenance of heterochromatin organization,  
87 regulation of gene expression and silencing of specific ERV.

88

89

## 90 RESULTS

91

### 92 **HP1 proteins are dispensable for hepatocyte proliferation and survival**

93 To unravel HP1 *in vivo* functions, the HP1 $\beta$  and HP1 $\gamma$  encoding-genes (*Cbx1* and *Cbx3*,  
94 respectively) were inactivated in the liver of HP1 $\alpha$ KO mice (Allan et al., 2012) using the Cre  
95 recombinase expressed under the control of the hepatocyte-specific albumin promoter  
96 (Postic et al., 1999; Weisend et al., 2009) (Fig. 1A). Liver-specific excision of the *Cbx1* and  
97 *Cbx3* alleles was confirmed by PCR (Fig. 1B), and the level of HP1 $\beta$  and HP1 $\gamma$  protein  
98 expression was checked by western blotting. At 7 weeks post-partum as well as at middle-  
99 aged (3-6 months), the overall level of HP1 $\beta$  and HP1 $\gamma$  was decreased by about 60% in  
100 mutant as compared to controls livers (Fig. 1C). Furthermore, immuno-fluorescence (IF)  
101 analysis of liver cryo-sections using anti-HP1 $\beta$  and -HP1 $\gamma$  antibodies showed that their  
102 expression was lost in about 60% of liver cells in mutant mice compared with controls (Fig.  
103 1D). As this percentage is similar to the estimated 60-70% hepatocyte fraction within liver,  
104 these findings indicated that both proteins were concomitantly depleted in most hepatocytes  
105 (Si-Tayeb et al., 2010). As expected since *Cbx5* (HP1 $\alpha$ -encoding gene) was knocked out in  
106 all body cells, HP1 $\alpha$  could not be detected in mutant livers (Fig. 1B-C). These animals were  
107 thereafter called HP1-triple knockout (HP1-TKO). Histological analysis of  
108 hematoxylin/eosin/Safran (HES) stained paraffin-embedded liver sections from 7-week-old  
109 (young) and 3-6-month-old (middle-aged) control and HP1-TKO animals did not reveal any  
110 significant alteration of the structural organization of hepatocytes nor of the liver parenchyma  
111 (Supplementary Figure 1). In agreement with this observation, analysis of proliferation (Ki67)  
112 and apoptosis (Activated caspase 3) by immuno-histochemistry (IHC) of Tissue Micro Arrays  
113 (TMA) containing liver sections from young and middle-aged control and HP1-TKO mice did  
114 not reveal any significant difference between mutant and control animals (Fig. 1E1-2). As  
115 HP1 have been shown to play critical roles in genome stability (Bosch-Presegué et al., 2017;  
116 Shi et al., 2008), IHC was also performed with an antibody against the phosphorylated form

117 of H2AX ( $\gamma$ H2AX), a marker of DNA damage (Kuo and Yang, 2008). The number of  $\gamma$ H2AX-  
118 positive cells was not significantly different in livers from young and middle-aged HP1-TKO  
119 and control animals, suggesting that HP1 proteins depletion did not lead to major genomic  
120 instability within hepatocytes (Fig. 1E3).

121 To unambiguously test the viability of hepatic cells in absence of any HP1 isoform, we  
122 established bipotential hepatic BMEL (Bipotential Mouse Embryonic Liver) cell lines  
123 according to the protocol described by Strick-Marchand & Weiss (Strick-Marchand and  
124 Weiss, 2002) inactivated for all HP1 encoding genes as illustrated on figure 1F. As assessed  
125 by western blotting, none of the HP1 were expressed in these cells that were thereafter  
126 called HP1-TKO (Fig. 1G). These cells were morphologically similar to control cells and had  
127 a tendency to proliferate faster than control cells (Fig. 1H). Altogether, these data  
128 demonstrated that in mouse, the three HP1 proteins are dispensable for hepatocyte survival  
129 both *in vivo* and *ex vivo* as well as for the appropriate structural organization of the liver  
130 parenchyma throughout life.

131

### 132 **Heterochromatin organization is altered in HP1-TKO hepatocytes**

133 Since, HP1 are well-known components of chromatin, we assessed the impact of their  
134 loss on chromatin sub-nuclear organization and functions in liver and BMEL cells. First, the  
135 level of different heterochromatin-associated histone marks was investigated by western  
136 blotting. H3K9me3 and H4K20me3, two marks of constitutive heterochromatin, were strongly  
137 decreased in the liver of 7-week-old and middle-aged HP1-TKO mice compared with age-  
138 matched controls. Conversely, no change of H3K27me3, a facultative heterochromatin mark,  
139 nor of H3K9me2, H4K20me2 and H4K20me1 was observed in these same samples (Fig.  
140 2A). The decrease of H3K9me3 without any significant change of H3K27me3 nor of  
141 H3K4me3 was also observed in HP1-TKO as compared to control BMEL cells (Fig. 2B). IF  
142 analysis indicated that the high level of H3K9me3 associated with chromocenters (i.e., DAPI-  
143 dense structures that contain structural components of heterochromatin) observed in control

144 BMEL cells was drastically reduced in HP1-TKO cells, whereas the labeling within  
145 euchromatin was not significantly affected (Fig. 2C). The level and distribution of methylated  
146 DNA was assessed by IF using an antibody against 5-methyl cytosine (5mC). This analysis  
147 showed no difference between control and HP1-TKO BMEL cells (Fig. 2C). Although these  
148 results suggested that the absence of the three HP1 proteins affected heterochromatin  
149 organization, chromocenters still clustered, but tended to be more associated with the  
150 nuclear periphery in HP1-TKO hepatocytes than in control cells (Fig. 2D1). To more precisely  
151 quantify the distribution of chromocenters, nuclei were divided in four co-centric areas in  
152 which the intensity of DAPI staining was measured using the cell profiler software (schema in  
153 Fig. 2D2). In control nuclei, DAPI staining was roughly homogeneously distributed throughout  
154 the four areas (Fig. 2D2). Conversely, in HP1-TKO nuclei, DAPI intensity increased  
155 progressively from the inner part to the external part. This indicated that in the simultaneous  
156 absence of all HP1 isoforms, heterochromatin tended to be more associated with the nuclear  
157 periphery than in control nuclei. This was not associated with any significant change of the  
158 level nor distribution of laminB1 (LamB1) as assessed by IF, strongly suggesting that  
159 although the level of heterochromatin is reduced at the nuclear periphery, the absence of  
160 HP1 did not lead to any significant alteration of the nuclear envelop organization (Fig.2C).  
161 We then measured the expression and the number of major satellite repeats that represent  
162 the main component of pericentromeric heterochromatin. Surprisingly this analysis revealed  
163 no significant alteration and even a tendency of these repeats to be down-regulated in  
164 absence of HP1 in both liver and BMEL cells whereas the number of these repeats within the  
165 genome was unchanged (Fig. 2E and data not shown). These data demonstrated that in  
166 hepatocytes, although HP1 proteins are essential for the maintenance of constitutive  
167 heterochromatin-associated histone marks and for the sub-nuclear organization of  
168 chromocenters, they are not required for the regulation of major satellite expression nor for  
169 their stability.

170

171 **HP1 proteins are involved in the regulation of liver-specific gene expression**  
172 **programs**

173 To investigate the effect of the loss HP1 on gene expression, an unbiased RNA-seq  
174 transcriptomic analysis was performed on libraries prepared from 7 week-old control and  
175 HP1-TKO liver RNA. This analysis showed that 1215 genes were differentially expressed  
176 between control and HP1-TKO liver samples (with a 1.5-fold threshold difference and an  
177 adjusted  $P \leq 0.05$ ) (Fig. 3A). As expected on the basis of the established role of HP1 as gene  
178 silencers in several cellular and animal models and of the loss of the repressive H3K9me3  
179 mark (this study), more genes were up-regulated (730) than down-regulated (485) in HP1-  
180 TKO compared with control livers (Supplementary Table 1). These genes were distributed  
181 throughout the genome without preferential chromosomal location, compared with the global  
182 gene distribution (Supplementary Figure 2).

183 Analysis of differentially expressed genes (HP1-dependent genes) using David Gene  
184 Ontology (<https://david.ncifcrf.gov/>) and Gene Set Enrichment Analysis (GSEA;  
185 <http://software.broadinstitute.org/gsea/index.jsp>) programs revealed that several biological  
186 processes were significantly affected in HP1-TKO livers. The most striking feature of this  
187 analysis was the very high enrichment of genes encoding for the Krüppel Associated Box  
188 (KRAB) domain within up-regulated genes ( $P = 5.8E-26$ ) (Fig. 3B & Supplementary Tables 1  
189 & 2). The up-regulation of several of these genes (*Rsl1*, *Zfp345*, *Zfp445* and *Zkscan3*) was  
190 validated by RT-qPCR in 7-week-old HP1-TKO livers compared with age-matched controls  
191 (Fig. 3C). Beside these KRAB domain encoding genes, up-regulated genes were also  
192 enriched in genes classified as belonging to the GO terms signal peptide, immunity,  
193 guanylate-binding protein, response to virus, etc... (Fig. 3B), strongly suggesting activation of  
194 an inflammatory response in HP1-TKO livers (Fig. 3B-C & Supplementary Table 4). Genes  
195 encoding for members of the p450 cytochrome (CYP) family were also strongly enriched in  
196 HP1-dependent genes with 7 up-regulated and 18 down-regulated amongst the 79 CYP  
197 genes detected in the present RNAseq analysis. Mammalian P450s are membrane bound



198 mostly in the endoplasmic reticulum (ER) and some in the mitochondria and play essential  
199 roles within liver (Guengerich, 2018). These genes are involved in numerous metabolic  
200 processes including reduction-oxidation (redox) processes, steroid hormone biosynthesis  
201 and lipid metabolic process (Bhattacharyya et al., 2014; Park et al., 2014). In particular, 11  
202 HP1-dependent genes encode for members of the CYP2 family involved in ER and redox  
203 functions (Table 1). Moreover, *Nox4*, the gene encoding the nicotinamide adenine  
204 dinucleotide phosphate (NADPH) oxidase isoform most consistently associated with ER and  
205 ROS in liver (Paik et al., 2014), was significantly down-regulated in HP1-TKO as compared  
206 with control livers (Fig. 3C & Supplementary Table 1). It was thus not surprising that  
207 oxidation-reduction, ER, steroid hormone biosynthesis, lipid metabolic process were amongst  
208 the most affected functions in HP1-TKO livers (Fig. 3B & Supplementary Tables 2; 3; 5 and  
209 6). The differential expression of several genes involved in liver-specific functions such as  
210 *Cyp2c29* and *Cyp2b10* (ER and redox), *Ifit2* (interferon  $\gamma$  signature) and *Nox4* (ROS  
211 production) was validated by RT-qPCR in 7 week-old HP1-TKO and age-matched control  
212 livers (Fig. 3C).

213         These data demonstrated that although the liver of HP1-TKO animals did not display  
214 any significant phenotypical abnormality, HP1 proteins are required for regulating directly or  
215 indirectly the expression of several genes with key functions for liver homeostasis.

216

## 217 **The loss of HP1 leads to reactivation of specific endogenous retroviruses and up-** 218 **regulation of associated genes**

219         As mentioned above genes encoding for the KRAB domain were highly enriched in up-  
220 regulated genes in HP1-TKO livers. The KRAB domain is almost exclusively present in the  
221 KRAB-Zinc Finger Protein (KRAB-ZFP) family of transcriptional repressors (Yang et al.,  
222 2017). The best characterized genomic target of these repressors are themselves through an  
223 auto-regulatory loop and retrotransposons of the endogenous retroviruses (ERV) family

224 (O'Geen et al., 2007; Yang et al., 2017). The expression of DNA repeats was therefore  
225 investigated in our RNA-seq dataset. To this end, the coordinates of all annotated DNA  
226 repeats of the RepeatMasker database (mm10 assembly) were aligned against the RNA-seq  
227 reads and only those that could be assigned unambiguously to a specific genomic locus  
228 were analyzed. In total, 846 repeats were deregulated in HP1-TKO livers compared with  
229 control livers: 603 (71.3%) were up-regulated and 243 (28.7%) down-regulated (Fig. 4A &  
230 Supplementary Table 7). Among the most represented up-regulated repeats, 59.4% were  
231 ERV, 19.2% long interspersed nuclear elements (LINEs) and 9.3% short interspersed  
232 elements (SINEs) whereas the genome-wide distribution of these elements was 26.8%  
233 ERVs, 45.1% LINEs and 17.3% SINEs (Fig. 4B & Supplementary Table 7). This biased  
234 distribution of repetitive elements strongly supported the hypothesis that HP1 proteins were  
235 preferentially involved in ERV silencing.

236 To determine whether the differential expression of such repeats in HP1-TKO livers could  
237 be associated with deregulation of gene expression, we first generated a map of HP1-  
238 dependent repeats located in the vicinity of HP1-dependent genes. To this end, 100kb were  
239 added on both sides of each HP1-dependent gene, and the HP1-dependent repeats present  
240 in these regions were scored. This analysis showed that a fraction of HP1-dependent genes  
241 (138 up-regulated and 94 down-regulated) was associated with HP1-dependent repeats.  
242 Interestingly, this physical association between HP1-dependent repeats and HP1-dependent  
243 genes correlated with a functional association since 84% of repeats associated with up-  
244 regulated genes were also up-regulated and 75.5% of repeats associated with down-  
245 regulated genes were down-regulated (Fig. 4C & Supplementary Tables 8 & 9). Analysis of  
246 the distance between HP1-dependent genes and HP1-dependent repeats showed that up-  
247 regulated repeats tended to be located closer to up-regulated genes rather than to down-  
248 regulated genes, whereas inversely down-regulated repeats tended to be located closer to  
249 down than up-regulated genes. As a control, the alignment of all annotated repeats against  
250 HP1-dependent genes showed that repeats were homogeneously distributed in the regions

251 surrounding both up-regulated and down-regulated genes (Fig. 4D). Altogether, this analysis  
252 strongly suggested a link between the loss of HP1, the reactivation of some ERV and the up-  
253 regulation of genes in their neighborhood. In agreement with this conclusion, several  
254 deregulated genes associated with deregulated repeats such as *Mbd1*, *Bglap3*, *Obpa*, *Bmyc*,  
255 *Fbxw19* and *Zfp445* have already been shown to be controlled by ERVs (Fig. 4E; Ecco et al.  
256 2016; Herquel et al. 2013). Interestingly, *Zfp445* was associated with four up-regulated  
257 MERK26-int repeats that were at nearly equal distance between this gene and *Zkscan7*,  
258 another KRAB-ZFP-encoding gene also up-regulated in HP1-TKO liver. This suggested that  
259 the reactivation of these specific repeats might interfere with the expression of both genes  
260 (Fig. 4E).

261 Altogether, these data strongly suggested that the HP1-dependent expression of specific  
262 genes rooted in the HP1-dependent reactivation of certain repeats, mainly of the ERV family,  
263 within the genome. Whether these repetitive regulatory elements are used in physiological  
264 conditions remains to be studied. These results could seem paradoxical with the increased  
265 expression of several KRAB-ZFPs that are known to be involved in ERV silencing; however,  
266 they are in agreement with the proposed mechanism of auto-regulation of KRAB-ZFP-  
267 encoding genes through interaction with the corepressor TRIM28 (O'Geen et al., 2007). We  
268 therefore hypothesized that in HP1-TKO livers, KRAB-ZFP-encoding genes and their targets  
269 including ERVs are over-expressed because of a HP1-dependent loss of TRIM28 activity.

270

### 271 **HP1 is necessary for TRIM28 activity within liver**

272 To investigate the relationship between HP1, KRAB-ZFPs, TRIM28 and ERVs in liver,  
273 RNA-seq, RT-qPCR and western blot assays were used to analyze the effect of HP1 loss on  
274 TRIM28 expression in liver. Neither TRIM28 mRNA nor protein expression were significantly  
275 altered in HP1-TKO as compared to control livers demonstrating that HP1 were not required  
276 for the regulation of TRIM28 expression but rather for its activity (Fig. 5A-B). To assess  
277 whether the loss of association between TRIM28 and HP1 could recapitulate the phenotype

278 induced by the loss of HP1 on TRIM28 functions, we used the previously described mouse  
279 models in which either a mutated TRIM28 protein that cannot interact with HP1 (T28HP1box)  
280 is expressed instead of the WT TRIM28 protein or in which TRIM28 is depleted (T28KO)  
281 specifically within liver (Herquel et al., 2011; Herzog et al., 2011). As expected, western-blot  
282 analysis indicated that TRIM28 expression was strongly decreased in T28KO livers, whereas  
283 it was only decreased by about two-fold in T28HP1box livers (this mutation is present only on  
284 one *Trim28* allele, and the other one is inactivated) (Fig. 5C). The level of the three HP1  
285 proteins was not affected in these mouse strains. RT-qPCR analysis showed that several  
286 HP1-dependent genes including *Nox4*, *Cypc29* and *Rsl1* were not affected in T28HP1box  
287 and T28KO livers (Fig. 5D). Conversely, *Cyp2b10*, *Ifit2* and the KRAB-ZFP-encoding genes  
288 *Zfp345* and *Zfp445* that were all over-expressed in HP1-TKO liver were also up-regulated in  
289 T28HP1box and T28KO livers (Fig. 5D). The higher expression level of *Ifit2* and *Zfp345* in  
290 T28HP1box as compared to T28KO livers strongly suggested a dominant negative role of  
291 T28HP1box on their expression. Altogether, these data demonstrated that HP1 proteins  
292 regulate gene expression through TRIM28-dependent and -independent mechanisms. To  
293 test whether the HP1-dependent ERV-associated genes also required TRIM28, the  
294 expression of *Mbd1* and *Bglap3* was assessed in T28KO and T28HP1box livers. Like in  
295 HP1-TKO livers, they were over-expressed in both T28KO and T28HP1box livers, although  
296 to a lesser extent as compared to HP1-TKO livers suggesting that HP1 were able to partially  
297 repress the expression of these two genes even in the absence of TRIM28 (Fig. 5E).

298

### 299 **HP1 proteins prevent tumor development in liver**

300 Analysis of old mice (>44 weeks of age) showed that although HP1-TKO animals were  
301 morphologically indistinguishable from control littermates, 72.7% of females (n=11) and  
302 87.5% of males (n=8) had developed liver tumors whereas none of the female (n=24) and  
303 9.1% of male (n=44) controls did so (Fig. 6A). The number and size of tumors were very

304 variable among animals (Fig. 6B), suggesting that the absence of HP1 generated an  
305 environment prompt to tumorigenesis and that other factors were also involved in this  
306 process. Analysis of the excision of the floxed *Cbx1* (HP1 $\beta$ ) and *Cbx3* (HP1 $\gamma$ ) genes showed  
307 equivalent rate of recombination in both the tumor and healthy liver tissues indicating that  
308 tumors originated from HP1-TKO hepatocytes (Supplementary Fig. 3A). Histological analysis  
309 of paraffin-embedded liver tissue sections revealed that most old male (M-TKO) and female  
310 (F-TKO) HP1-TKO animals developed tumor nodules that could easily be distinguished from  
311 the rest of the liver parenchyma (Fig. 6C). These nodules were characterized by the  
312 presence of well-differentiated hepatocytes but without their specific trabecular organization,  
313 and thus, were identified as typical hepatocellular carcinoma (HCC). Moreover, RT-qPCR  
314 analysis of the expression of  $\alpha$ -fetoprotein (*Afp*), a marker of human HCC, in control and in  
315 normal (TKON) and tumor (TKOT) HP1-TKO liver samples showed that *Afp* was strongly  
316 over-expressed exclusively in the tumor tissue of three of the five tested tumors  
317 (Supplementary Figure 3C). Analysis of cell proliferation (Ki67), apoptosis (activated caspase  
318 3) and global response to DNA damage ( $\gamma$ H2AX) by IHC on TMA of paraffin-embedded liver  
319 sections from old mice showed a two-fold increase of cell proliferation in both the tumor  
320 (TKOT) and non-tumor (TKON) parts of HP1-TKO liver samples compared with control parts  
321 whereas no change was detected in the number of apoptotic-positive cells nor of positive  
322  $\gamma$ H2AX cells (Supplementary Fig. 3B).

323 Similarly, T28KO and T28HP1box mice older than 42 weeks of age developed more  
324 frequently tumors in livers than controls, although at a lower rate than HP1-TKO animals  
325 (38.5% and 35.7% for T28KO and T28HP1box males and 26.3% and 31.2% for T28KO and  
326 T28HP1box females, respectively, Fig. 6D-E) strengthening the mechanistic link between  
327 HP1 proteins and TRIM28 for liver tumor prevention.

328 Finally, analysis of the expression of the ERV-associated genes *Mbd1* and *Bglap3* in old  
329 animals (Fig. 6F) showed that both genes were up-regulated in both normal (TKON) and  
330 tumor (TKOT) liver parts from old HP1-TKO animals as compared to control livers. In

331 contrast, *Mbd1* was no longer over-expressed in the liver (normal and tumor parts) of old  
332 TRIM28 mutant mice. For *Bglap3*, a slight over-expression was observed in T28KO but not in  
333 T28HP1box old animals, and in both cases the level of expression was very low as  
334 compared to HP1-TKO mice (Fig. 6G). These data showed that HP1 were required to  
335 maintain repression of the *Mbd1* and *Bglap3* genes most likely through the silencing of the  
336 associated ERV throughout life and that this function was mostly independent of TRIM28 in  
337 old animals.

338

339        **DISCUSSION**

340            In this study, we used the Cre-LoxP system to inactivate the three chromatin-  
341 associated HP1 proteins specifically within hepatocytes as soon as they acquired their  
342 identity during mouse development (Weisend et al., 2009). We demonstrated that the loss of  
343 HP1 proteins lead to the loss of the heterochromatin marks H3K9me3 and H4K20me3 and to  
344 the over-expression of specific retrotransposons but surprisingly not of the major satellite  
345 repeats. Furthermore, we demonstrated that HP1 are not required for cell viability but are  
346 critical within hepatocytes for preventing liver tumor development.

347            The finding that in the mouse, HP1 proteins were not essential for neither cell viability  
348 nor liver function was in contrast with many studies showing the fundamental functions of  
349 each HP1 isoform in various pluripotent and differentiated cellular systems (Huang et al.,  
350 2017; Mattout et al., 2015) as well as during embryonic development in various species, such  
351 as *Drosophila* (Eissenberg et al., 1992), *C. elegans* (Schott et al., 2006) and the mouse (our  
352 unpublished data). One can hypothesize that liver chromatin organization and functions are  
353 highly specific and mostly independent of HP1 and/or that some compensatory mechanisms  
354 through yet unknown factors, take place specifically in mouse liver (Eissenberg and Elgin,  
355 2014; Kwon and Workman, 2011; Nishibuchi and Nakayama, 2014). In favor of the  
356 hypothesis of a specific liver chromatin organization, it is important to note that liver is mostly  
357 quiescent throughout life but is able to regenerate upon stress (e.g., partial hepatectomy)  
358 essentially through the re-entry of quiescent and fully differentiated hepatocytes into cell  
359 cycle rather than via stem cell proliferation, like in other tissues (Fausto et al., 2006; Kurinna  
360 and Barton, 2011). This specific ability of differentiated hepatocytes to enter/exit quiescence  
361 could rely on a peculiar loose chromatin organization that might be less sensitive to the loss  
362 of HP1 as compared to other cell types. To this respect, it is interesting to note that liver is  
363 the tissue that express the lowest level of all HP1 isoforms (<https://www.proteinatlas.org>).

364 We showed that HP1 loss was accompanied by a drastic reduction of the two  
365 heterochromatin marks H3K9me3 and H4K20me3 and a partial re-localization of DAPI-dense  
366 structures towards the nucleus periphery. However, in contrast to the results reported upon  
367 loss of H3K9me3 induced by inactivation of the histone methyltransferases SUV39H1 and  
368 SUV39H2, the loss of H3K9me3 in HP1-TKO hepatocytes did not result in neither decrease  
369 of H3K9me2 nor over-expression of major satellite repeats, but rather in their slight down-  
370 regulation (Lehnertz et al., 2003; Velazquez Camacho et al., 2017). This observation  
371 supports the conclusion that HP1 are essential to maintain H3K9me3 but not H3K9me2  
372 throughout life and that this latter histone modification is sufficient to keep major satellite  
373 sequences at a low level of transcription. It has been reported that SUV39H1 over-  
374 expression is associated with HCC development (Fan et al., 2013) and that HCC induced by  
375 a methyl-free diet is also characterized by elevated SUV39H1 expression and increased  
376 H3K9me3 but with reduced H4K20me3 deposition (Pogribny et al., 2006). This suggests that  
377 decreased level of H4K20me3 rather than of H3K9me3 in HP1-TKO mice could be a key  
378 determinant of tumorigenesis. In support of this hypothesis, H4K20me3 has been reported to  
379 be essential for genome integrity that is known to be essential for cell identity and for proper  
380 timing of heterochromatin replication whose deregulation has recently been proposed to be  
381 involved in cancers (Brustel et al., 2017; Du et al., 2019; Jørgensen et al., 2013). Further  
382 investigations are required to determine which, if any, alteration of heterochromatin  
383 organization induced by the lack of the three HP1 proteins is involved in tumorigenesis.

384 HP1 ablation also led to the deregulation (both up- and down-regulation) of many genes,  
385 strongly suggesting that the three HP1 proteins are involved in both repression and activation  
386 of gene expression, as reported by others (Eissenberg and Elgin, 2014; Lee et al., 2013;  
387 Piacentini et al., 2009; Vakoc et al., 2005). Many of these genes are involved in liver specific  
388 functions and it will be interesting to identify the determinant for their responsiveness to HP1  
389 depletion. Of particular interest, we found that many genes encoding for the p450  
390 cytochrome family (Cyp) were deregulated in HP1 mutant mice. Several of these proteins are



391 involved in the detoxification of the liver and in oxidative stress that are two key factors in  
392 hepatocarcinogenesis (Takaki and Yamamoto, 2015). How these genes are regulated by  
393 HP1 remains to be determined, however nuclear receptors of the Peroxisome Proliferation-  
394 Activated Receptors (PPAR) have been shown to be important in this process (Cizkova et  
395 al., 2012). Interestingly, we found that PPAR $\gamma$  was strongly down-regulated in HP1 mutant  
396 mice and it is tempting to speculate that this low expression of PPAR $\gamma$  underlies the  
397 deregulation of several *Cyp* genes. Furthermore, HP1-TKO livers were also characterized by  
398 a transcriptional signature of an interferon  $\gamma$  response strongly suggesting liver inflammation,  
399 another well-recognized factor for hepatocarcinogenesis. What is the leading cause of  
400 inflammation in HP1 mutant mice is still unknown but might be link to a continuum moderate  
401 cellular dysfunction induced by the altered transcriptome in these mice. Finally, one of the  
402 most striking result in the present study was the enrichment in genes encoding members of  
403 the KRAB-ZFP family of transcriptional co-repressors. The KRAB domain is almost  
404 exclusively present in the KRAB-Zinc Finger Protein (KRAB-ZFP) family of transcriptional  
405 repressors that have the particularity to be still actively evolving in mammals (Yang et al.,  
406 2017). Little information is available about the functions of most of these transcription factors,  
407 however it is now well recognized that transposable elements of the ERV family are one of  
408 their main targets through the recruitment of the TRIM28 corepressor (Jacobs et al., 2014;  
409 Wolf et al., 2015; Yang et al., 2017). These mobile genetic elements constitute a threat for  
410 the genome stability and/or gene expression because of their ability to insert at any genomic  
411 location. Thus, an important challenge for the genome is to keep all these elements silent  
412 and unable to get transposed. However and paradoxically, increasing evidence suggests that  
413 they have been co-opted to serve as regulatory sequences in the host genome (Thompson  
414 et al., 2016). Here, we found that, although HP1 proteins were shown to be dispensable for  
415 ERV silencing in ES cells (Maksakova et al., 2011), they are involved in silencing of specific  
416 ERVs in liver. We provide evidence that this function relies on the inactivation of the KRAB-  
417 ZFP/TRIM28 complex. Although we have not yet identified the determinants underlying the  
418 HP1-dependency of specific retrotransposons, our data strongly suggest that the reactivation

419 of some ERVs induce the over-expression of genes in their vicinity. Some of these ERVs, as  
420 those associated the *Zfp445*, *Fbwx19* and *Obp2a* genes, behave either as enhancer-like  
421 elements as proposed by others (Bojkowska et al., 2012b; Herquel et al., 2013), whereas  
422 others rather behave as alternative promoters (e.g., for the *Mbd1* and *Bglap3* genes).  
423 Interestingly, inactivation of the nuclear receptor corepressor TRIM24 leads to *Mbd1*, *Zfp445*,  
424 *Obp2a* over-expression, whereas inactivation of the KRAB-ZFP corepressor TRIM28 causes  
425 over-expression of *Bglap3* and *Fbxw19* (Ecco et al., 2016; Herquel et al., 2013). Altogether,  
426 these data strongly suggest that HP1 acts upstream of these two corepressors, a conclusion  
427 in line with our previous observation that TRIM24 and TRIM28 can be found in the same  
428 complex in liver (Herquel et al., 2011), and with our hypothesis that HP1 regulates TRIM28  
429 activity in liver. Because the depletion of either of these two corepressors also lead to HCC  
430 and because the over-expression of ERV has been proposed to play a role in tumorigenesis  
431 (Scarfò et al., 2016), we propose that one mechanism by which HP1 prevent tumor  
432 development is by silencing specific ERVs.

433 Although we cannot conclude yet about the exact mechanisms underlying HP1  
434 functions in preventing tumor development, our study highlighted major HP1 roles in  
435 heterochromatin organization, regulation of gene expression and ERV silencing the alteration  
436 of which, as discussed above, could all contribute to hepatocyte transformation and liver  
437 tumorigenesis.

438

## 439 MATERIALS AND METHODS

440

### 441 Mouse models.

442 The Cbx5KO, T28KO (TRIM28KO) and T28HP1box (TRIM28-L2/HP1box) mouse strains  
443 were described previously (Allan et al., 2012; Cammas et al., 2000; Herzog et al., 2011).

444 Exons 2 to 4 within the *Cbx1* gene (HP1 $\beta$ ), and exon 3 within the *Cbx3* gene (HP1 $\gamma$ ) were  
445 surrounded by LoxP sites. Excision of the floxed exons exclusively in hepatocytes by using  
446 mice that express the Cre recombinase under the control of the albumin promoter (Alb-Cre  
447 mice, (Postic et al., 1999)) led to the removal of the starting ATG codon of the two genes, as  
448 well as to a frameshift within the CSD-encoding sequence of *Cbx1* and the CD-encoding  
449 sequence of *Cbx3*. *Cbx5*, the gene encoding HP1 $\alpha$ , was inactivated in all body cells by  
450 removing exon 3 using the Cre recombinase under the control of the cytomegalovirus (CMV)  
451 promoter, as described previously (Cbx5KO mice) (Allan et al., 2012). *Cbx5*<sup>+/-</sup> animals were  
452 then crossed with *Cbx3*<sup>L2/L2</sup> and *Cbx1*<sup>L2/L2</sup> animals to generate mice in which all three  
453 proteins can be depleted in tissues upon expression of the Cre recombinase. *Cbx5*<sup>+/-</sup>;  
454 *Cbx3*<sup>L2/L2</sup>; *Cbx1*<sup>L2/L2</sup> were crossed with Alb-Cre transgenic mice to produce *Cbx5*<sup>+/-</sup>;  
455 *Cbx3*<sup>L2/+</sup>; *Cbx1*<sup>L2/+</sup>; Alb-Cre mice that were intercrossed to finally produce HP1-TKO mice  
456 and their controls. TRIM28L2/HP1box were crossed with Alb-Cre transgenic mice to produce  
457 mice that express TRIM28HP1box as the only TRIM28 protein in hepatocytes (TRIM28-  
458 liverL-/HP1box, called T28HP1box mice in this article).

459 For each experiment, experimental and control mice were age-matched and whenever  
460 possible were littermates. A minimum of three animals of each genotype were used for each  
461 experiment. This number was deemed sufficiently appropriate to account for normal  
462 variation, as determined from previous studies. The number of animals used for each  
463 experiment is indicated in the figure legends. No statistical method was used to predetermine  
464 sample size.

465 Mice were housed in a pathogen-free barrier facility, and experiments were approved by the  
466 national ethics committee for animal warfare (n°CEEA-36).

467

### 468 **Antibodies/oligonucleotides**

469 The antibodies used in this study were: the rabbit anti-TRIM28 polyclonal antibody PF64,  
470 raised against amino acids 141–155 of TRIM28<sup>64</sup>; the anti-HP1 $\alpha$ , anti-HP1 $\beta$  and anti-HP1 $\gamma$   
471 monoclonal antibodies 2HP2G9, 1MOD1A9, and 2MOD1G6<sup>65</sup>, respectively. Anti-Casp3A  
472 (9661, Cell Signaling); anti- $\gamma$ H2AX (Ab11174, Abcam), anti-Ki67 (M3064, Spring Bioscience).  
473 Anti-5mC (NA81, Calbiochem). Oligonucleotides are described in Supplementary Table 10.

474

### 475 **Tissue processing for histology.**

476 For fresh frozen tissues, 3mm sections of the liver large lobe were embedded in the OCT  
477 compound (TissueTek) following standard protocols, and 18 $\mu$ m-thick sections were cut using  
478 a Leica CM1850 cryostat and stored at  $-80^{\circ}\text{C}$ .

479 For paraffin-embedded tissues, 3mm sections of the liver large lobe were fixed in 4% neutral-  
480 buffered formalin (VWR Chemicals) at room temperature (RT) overnight, and stored in 70%  
481 ethanol at  $4^{\circ}\text{C}$ . Fixed tissues were processed using standard protocols and embedded in  
482 paraffin wax. Three- $\mu$ m-thick sections were cut using a Thermo Scientific Microm HM325  
483 microtome, dried at  $37^{\circ}\text{C}$  overnight and stored at  $4^{\circ}\text{C}$ .

484

### 485 **Immuno-fluorescence analysis.**

486 Cryo-sections were fixed in formaldehyde (2%) at RT for 15min, and then air dried at RT for  
487 20min. Sections were rinsed in PBS (3 x 15min) and incubated in 5% BSA/PBS/0.3% Triton  
488 X-100 at RT for 30min to block non-specific antibody binding. Sections were the incubated  
489 with primary antibodies diluted in 1% BSA/PBS/0.3% Triton X-100 at  $4^{\circ}\text{C}$  overnight, or at RT  
490 for 1 h. Sections were then washed in PBS/0.1% Triton X-100 (3  $\times$  5 min) and incubated with  
491 the appropriate secondary antibody [goat-anti-rabbit Alexa Fluor 488 (Molecular Probes,  
492 1:800), goat-anti-mouse Alexa Fluor 568 (Molecular Probes, 1:800)] diluted in 1%  
493 BSA/PBS/0.3% Triton X-100 at RT for 1h. After three washes (5min/each) in PBS/0.1%  
494 Triton X-100, sections were washed in water for 5 min before mounting with VECTASHIELD

495 mounting medium (Vector Laboratories) with 4',6-Diamidino-2-Phenylindole, Dihydrochloride  
496 (DAPI). Sections were dried at RT overnight, and then kept at 4°C before image acquisition  
497 with a Zeiss Apotome2 microscope and analysis using ImageJ.

498

#### 499 **Immuno-histochemistry.**

500 Paraffin-embedded liver sections were processed for routine hematoxylin, eosin and Safran  
501 or reticulin staining. For immuno-histochemistry, sections were washed in PBS/1% Triton X-  
502 100 at RT (3 x 30 min) and incubated in blocking solution (PBS/1% Triton X-100/10% fetal  
503 calf serum/0.2% sodium azide) at RT twice for 1h, followed by incubation in 3% H<sub>2</sub>O<sub>2</sub> in  
504 blocking solution at 4 °C overnight. This was followed by two washes of 15 min/each in  
505 blocking solution, and incubation with primary antibodies at 4 °C overnight. Sections were  
506 washed in blocking solution (3 x 1h), and then in PBS/1% Triton X-100 (3 x 10min). The  
507 secondary antibody was diluted in blocking solution (without sodium azide) and added at RT  
508 for 1h. Sections were then washed in PBS (3 × 1 h) before mounting with VECTASHIELD  
509 mounting medium with DAPI. Images were acquired with a Zeiss Apotome2 microscope and  
510 processed using ImageJ.

511

#### 512 **RNA extraction and RT-qPCR assays**

513 RNA was isolated from liver samples using TRIzol, according to the manufacturer's  
514 recommendations (Life technologies). 2µg of total RNA was incubated with 2U of DNase 1 at  
515 37°C for 30min. For reverse transcription, a mixture containing 2µg of DNA-free total RNA,  
516 0.125µg of random primers and 0.25µg of oligodT was denatured at 70°C for 10min, and  
517 then incubated with 1U Superscript III (Invitrogen) at 50°C for 1h. 1/100 of this reaction was  
518 used for real-time qPCR amplification using SYBR Green I (SYBR Green SuperMix, Quanta).

519

#### 520 **RNA-seq**

521 Total RNA from liver samples from 7-week-old control and HP1-KO mice was used for library  
522 preparation using the Illumina TruSeq Stranded mRNA Sample Preparation kit.

523 Polyadenylated RNA was purified using magnetic oligo(dT) beads and then fragmented into  
524 small pieces using divalent cations at elevated temperature. The cleaved RNA fragments  
525 were copied into first-strand cDNA using reverse transcriptase and random primers in the  
526 presence of actinomycin D. Second-strand cDNA synthesis was performed using dUTP,  
527 instead of dTTP, resulting in blunt double-stranded cDNA fragments. A single 'A' nucleotide  
528 was added to the 3' ends of the blunt DNA fragments using a Klenow fragment (3' to 5'exo  
529 minus). The cDNA fragments were ligated to double-stranded TruSeq Universal adapters  
530 using T4 DNA Ligase. The ligated products were enriched by PCR amplification (98°C for  
531 30sec, followed by 15 cycles of 98°C for 10sec, 60°C for 30sec, and 72°C for 30sec; finally,  
532 72°C for 5min). Then, the excess of PCR primers was removed by purification using AMPure  
533 XP beads (Agencourt Biosciences Corporation). The quality and quantity of the final cDNA  
534 libraries were checked using a Fragment Analyzer (AATI) and the KAPA Library  
535 Quantification Kit (Roche), respectively. Libraries were equimolarly pooled and sequenced  
536 (50nt single read per lane) on a Hiseq2500 apparatus, according to the manufacturer's  
537 instructions. Image analysis and base calling were performed using the Illumina HiSeq  
538 Control software and the Illumina RTA software. Reads not mapping to rRNA sequences  
539 were mapped onto the mouse genome mm10 assembly using the Tophat mapper (v2.0.10  
540 58) and the Bowtie2 (v2.1.0) aligner. Gene expression was quantified from uniquely aligned  
541 reads using HTSeq v0.5.4p3 59 and gene annotations from the Ensembl release 75.  
542 Statistical analyses were performed using the method previously described (Love et al.,  
543 2014) implemented in the DESeq2 Bioconductor library (v1.0.19), taking into account the  
544 batch effect. Adjustment for multiple testing was performed with the Hochberg and Benjamini  
545 method (Hochberg and Benjamini, 1990).  
546 For repeat analysis, alignment positions were compared with repeats annotated in UCSC  
547 with RepeatMasker (rmsk table from mm10) and overlaps were kept relative to the strand.  
548 Among the multiple mapped reads, only those mapping to the same repeat type were kept.  
549 Repeat types that were significantly different between conditions were identified with

550 DESeq2 v1.0.19. Repeats found in exons were removed from the analysis because it was  
551 not possible to discriminate between differential gene and repeat expression.

552 Data are available at GEO (accession number: GSE119244).

553

#### 554 **Extraction of mouse liver nuclei**

555 Adult male mice were euthanized, and their livers removed and placed on ice. After  
556 dissection of the liver lobes and removal of the connective tissue and blood vessels,  
557 approximately 100 µg of liver tissue was washed in ice-cold homogenizing buffer (HB, 0.32M  
558 sucrose, 5mM MgCl<sub>2</sub>, 60mM KCl, 15mM NaCl, 0.1mM EGTA, 15mM Tris-HCl pH 7.4),  
559 minced with scissors, and homogenized with 7 ml of HB using a 15 ml Wheaton Dounce  
560 homogenizer and 20 strokes of the loose B pestle. Unless otherwise indicated, all  
561 subsequent steps were performed at 4°C. Homogenates were filtered through 100 µM layers  
562 of gauze, taken to 7 ml with HB and centrifuged in 15 ml Corning tubes at 6000 g for 10min.  
563 After discarding the supernatant, pellets were gently resuspended in the same tube with 2 ml  
564 of HB and 2 ml of nuclear extraction buffer (HB plus 0.4% Nonidet P-40) and incubated on  
565 ice for 10min. The mixtures were centrifuged (10.000 g for 10 min) in two tubes in which 8ml  
566 of separating buffer (1.2M sucrose, 5mM MgCl<sub>2</sub>, 60mM KCl, 15mM NaCl, 0.1mM EGTA,  
567 15mM Tris-HCl pH 7.4) was added. Pellets were resuspended in 1.0 ml of 0.25M sucrose  
568 and 1mM MgCl<sub>2</sub>, and transferred to a 1.5 ml Eppendorf tube. Nuclei were collected by  
569 centrifugation at 700 g at 4 °C for 10 min and stored at -70°C until use.

570

#### 571 **Statistics and reproducibility.**

572 The Microsoft Excel software was used for statistical analyses; the used statistical tests,  
573 number of independent experiments, and P-values are listed in the individual figure legends.

574 All experiments were repeated at least twice unless otherwise stated.

575 **ACKNOWLEDGMENTS:**

576

577 We thank P. Chambon, C. Sardet, T. Forné, D.Fisher, E. Julien and C. Grimaud for helpful  
578 discussions and critical reading of the manuscript. We thank F. Bernex and L. LeCam, C.  
579 Keime and B. Jost for fruitful discussions. We thank L. Papon, H. Fontaine and C.  
580 Bonhomme for technical assistance and M. Oulad-Abdelghani and the IGBMC for the anti-  
581 HP1 and TRIM28 antibodies. We also thank the RHEM technical facility and particularly J.  
582 Simony for histological analysis and the IGBMC/ICS transgenic and animal facility for the  
583 initial establishment of the HP1 and TRIM28 mouse models. We thank C. Vincent and the  
584 IRCM animal core facility for the day to day care of the animal models. Finally, we thank S.  
585 Chamroeun for counting positive cells on TMA. We acknowledge the imaging facility MRI,  
586 member of the national infrastructure France-Biolmaging and supported by the French  
587 National Research Agency (ANR-10-INBS-04, «Investments for the future»).

588 This work was supported by funds from the Centre National de la Recherche Scientifique  
589 (CNRS), the Institut National de la Santé et de la Recherche Médicale (INSERM), the  
590 University of Montpellier and the Institut regional de Cancérologie de Montpellier (ICM). SH  
591 was funded by an Erasmus PhD fellowship. We also thank the Ministry of Education, Science  
592 and Technology of the Republic of Kosovo for a scholarships to support SH. FC was  
593 supported by grants from ANR (ANR 2009 BLAN 021 91; ANR-16CE15-0018-03), INCa  
594 (PLBIO13-146), ARC (PJA20131200357), and La ligue Régionale contre le Cancer (128-  
595 R13021FF-RAB13006FFA). Sequencing was performed by the MGX facility. Montpellier,  
596 France.

597

598



599 **AUTHORS' CONTRIBUTIONS:**

600 NS and SH performed the analysis of mice and interpreted the data. MP and CB made the  
601 libraries, generated and analyzed the RNA-seq data. AZ performed most of the RT-qPCR  
602 experiments. NP supervised the histological core facility and JYN performed the TMA. LK  
603 performed the pathological analysis of histological sections. EF performed some of the RT-  
604 qPCR analyses. EJ interpreted the data. FC designed, analyzed and interpreted the data and  
605 wrote the manuscript with input from all co-authors.

606

607 **DECLARATION OF INTEREST:** No competing interests

608 **FIGURES:**

609 **Figure 1: HP1 are not required for hepatocyte survival nor for liver organization and**  
610 **function.** (A) Schematic representation of the strategy to inactivate the three HP1-encoding  
611 genes (*Cbx1*, 3 and 5) specifically in hepatocytes using the recombinase Cre expressed  
612 under the control of the albumin promoter. For details see *Materials & Methods* section. (B)  
613 The hepatocyte-specific excision (L- alleles) of the *Cbx1* (HP1 $\beta$ ) and *Cbx3* (HP1 $\gamma$ ) genes and  
614 ubiquitous excision of *Cbx5* (HP1 $\alpha$ ) in HP1-TKO (1-4) mice was verified by PCR. Controls  
615 were littermates with either L2 (*Cbx1* and *Cbx3*) or "+" (*Cbx5*) alleles (5-8). Note that control  
616 #7 is *Cbx5*<sup>L-/+</sup>. (C) Western blot analysis of whole-cell extracts from liver samples confirmed  
617 the absence of HP1 $\alpha$  and the decreased expression of HP1 $\beta$  and HP1 $\gamma$ , due to the  
618 hepatocytes-specific excision of the corresponding genes in HP1-TKO as compared to age-  
619 matched control mice. Ponceau staining was used as loading control. (D) Immuno-  
620 fluorescence analysis of liver tissue cryosections confirmed the absence of HP1 $\beta$  and HP1 $\gamma$   
621 expression in about 60% of cells in 7-weeks old HP1-TKO mice compared with controls. (E1-  
622 3). (G) Immuno-histochemistry analysis of paraffin-embedded liver sections revealed no  
623 significant difference in proliferation (Ki67), apoptosis (caspase 3A), and DNA damage  
624 ( $\gamma$ H2AX) between HP1-TKO (n=5 7-week-old and n= 5 3-6month-old mice) and control mice  
625 (n=7 7-week- and n= 4 3-6-month-old mice). The number of positive cells were normalized to  
626 the total number of cells in each section and graphs recapitulating these data are shown as  
627 the mean  $\pm$  SEM. ns, no significant difference (Student's t-test). (F) Schematic representation  
628 of the strategy to establish BMEL cells from *Cbx5*<sup>-/-</sup>; *Cbx1*L2/L2; *Cbx3*L2/L2 fetal livers and  
629 to inactivate the three HP1-encoding genes. (G) Western blot analysis of whole-cell extracts

630 from BMEL cells confirmed the absence of all HP1 isoforms in HP1-TKO (*Cbx5*<sup>-/-</sup>;  
631 *Cbx1L2/L2*, *Cbx3L2/L2*; Cre-ERT treated with tamoxifen). "Het" were *Cbx5*<sup>+/-</sup>; *Cbx1L2/L2*  
632 BMEL cells and "Ctl" were *Cbx5*<sup>-/-</sup>; *Cbx1L2/L2*; *Cbx3L2/L2*; Cre-ERT non treated with  
633 tamoxifen. (H) Proliferation curves of "Het", 2 Ctl clones (C3 and C5) and 2 HP1-TKO clones  
634 (KO1 and KO3). The graph represent the average of three independent experiments done in  
635 triplicates.

636 **Figure 2: HP1 are essential for heterochromatin organization but not to regulate the**  
637 **expression of major satellites.** (A) HP1 are essential for the maintenance of the two  
638 heterochromatin hallmarks H3K9me3 and H4K20me3 in hepatocytes. Western blot analysis  
639 of nuclear extracts from liver of 7-week-old and middle-aged (3-6-month-old) controls (Ctl: 1;  
640 2; 5; 6) and HP1-TKO (TKO: 3; 4; 7; 8) mice with antibodies against the indicated histone  
641 marks. Ponceau staining was used as loading control. (B) HP1 are also essential for the  
642 maintenance of the H3K9me3 in BMEL cells. (C) IF analysis showed that H3K9me3 is lost on  
643 pericentromeric heterochromatin foci of HP1-TKO (TKO) BMEL cells without significant  
644 change in the distribution of H3K27me3. (D1-2) Loss of HP1 leads to a partial relocation of  
645 DAPI-dense regions (arrows) towards the nuclear periphery. Representative images of  
646 paraffin-embedded liver tissue sections from 7-week-old control (Ctl) and HP1-TKO (TKO)  
647 mice stained with DAPI (63x magnification). To select mostly hepatocytes, only the largest  
648 nuclei with a size comprised between 70 and 150  $\mu\text{m}^2$  and with a circular shape were  
649 selected for this analysis. 2D sections of nuclei were divided in four concentric areas (1 to 4)  
650 and DAPI staining intensity was quantified using the cell profiler software. The mean  
651 fractional intensity at a given radius was calculated as the fraction of the total intensity  
652 normalized to the fraction of pixels at a given radius in n=584 control and n=762 HP1-TKO  
653 (TKO) nuclei. Data are the mean  $\pm$  SEM. \*\*\*p value <0.001. (E) Loss of the three HP1  
654 proteins in hepatocytes does not affect the expression of major satellites. qPCR assays were  
655 performed using total RNA from livers of 7-week-old control (n=4) and HP1-TKO mice (n=4)  
656 and on control (Ctl) and HP1-TKO (TKO) BMEL.

657 **Figure 3: HP1 are essential regulators of gene expression in liver.** (A) MA plot after  
658 DSeq2 normalization of RNA-seq data from 7-week-old control (n=3) and HP1-TKO (n=4)  
659 liver RNA samples. Red dots represent genes that are differentially expressed between  
660 controls and HP1-TKO mice (adjusted p-value p <0.05). (B) Functional analysis of the  
661 differentially expressed genes using the DAVID Gene Ontology software. (C) Validation by  
662 RT-qPCR of the altered expression of the indicated genes. RNA was extracted from livers of  
663 7-weeks Controls (n=4) and HP1-TKO (n=4) animals. Data were normalized to *Hprt*

664 expression and are shown as the mean  $\pm$  SEM. ns, no significant difference \*p value <0.05;  
665 \*\*\*p value <0.001 (Student's t-test).

666 **Figure 4: HP1 are required for silencing specific endogenous retroviruses (ERVs) in**  
667 **hepatocytes.** (A) MA-plot after DSeq2 normalization of RNA-seq reads including repeats  
668 aligned against the Repbase database. Red dots represent genes and repeats that are  
669 differentially expressed between controls and HP1-TKO liver samples ( $p < 0.05$ ). (B) ERVs are  
670 over-represented in repeats that are up-regulated upon loss of all HP1 isoforms (Repeat\_Up)  
671 compared to repeats that are down-regulated (Repeat\_Down) and to the genome-wide  
672 distribution of repeats according to the RepeatMasker database (All). (C) Repeats over-  
673 expressed in HP1-TKO liver samples compared with controls (Repeat\_Up) are over-  
674 represented in regions ( $\pm 100$ kb) around genes that are over-expressed in HP1-TKO  
675 (genes\_up). Conversely, repeats down-regulated in HP1-TKO liver samples compared with  
676 controls (Repeat\_Down) are over-represented in regions ( $\pm 100$ kb) around genes repressed  
677 in HP1-TKO (genes\_down). (D) Repeats that are up-regulated or down-regulated upon HP1  
678 protein loss tend to be closer to genes that are up- or down-regulated in HP1-TKO,  
679 respectively. The absolute distance (in base pairs) was measured from the gene  
680 transcriptional start site and from the beginning of the repeat, according to the RepeatMasker  
681 annotation. (E) Representative Integrative Genomic Viewer snapshots of the indicated up-  
682 regulated genes associated with up-regulated repeat sequences.

683

684 **Figure 5: HP1 proteins are involved in the recruitment and/or maintenance of TRIM28**  
685 **at chromatin in hepatocytes.** (A) TRIM28 expression is independent of HP1 proteins. RT-  
686 qPCR quantification of TRIM28 expression in total RNA from livers of 7-week-old control (Ctl;  
687  $n=4$ ) and HP1-TKO (TKO;  $n=4$ ) mice. Data were normalized to *Hprt* expression and are  
688 shown as the mean  $\pm$  SEM. (B) Western blot analysis of 50 $\mu$ g of whole cell extracts from  
689 livers of 7-week-old control (1 and 2) and HP1-TKO (3 to 5) mice using an anti-TRIM28  
690 polyclonal antibody. Tubulin was used as loading control. (C) The loss of interaction between  
691 TRIM28 and HP1 proteins does not significantly alter the level of expression of TRIM28 and  
692 of the HP1 proteins. 50  $\mu$ g of whole liver extracts from 7-week-old controls ( $n=2$ ), T28KO  
693 ( $n=3$ ) and T28HP1box ( $n=3$ ) mice were analyzed by western blotting using the anti-TRIM28  
694 polyclonal antibody and anti-HP1 $\alpha$ ,  $\beta$  and  $\gamma$  monoclonal antibodies. GAPDH and Ponceau  
695 staining were used as loading controls. (D) TRIM28 is involved in the regulation of the  
696 expression of some but not all HP1-dependent genes. RT-qPCR analysis using liver RNA  
697 samples from 5 week-old control ( $n=5$ ), T28KO ( $n=5$ ) and T28HP1box ( $n=5$ ) mice. Data were  
698 normalized to *Hprt* expression and are shown as the mean  $\pm$  SEM. (E) TRIM28 is involved in

699 the regulated expression of HP1- and ERV-dependent genes. Expression of *Mbd1* and  
700 *Bglap3* by RT-qPCR analysis using liver RNA samples from 7-week-old control (Ctl) and  
701 HP1-TKO (TKO) mice, and 5-week-old control (n=5), T28KO (n=5) and T28HP1box (n=5)  
702 mice. Data were normalized to *Hprt* expression and are shown as the mean  $\pm$  SEM. ns, no  
703 significant difference \*p value <0.05; \*\*\*p value <0.001 (Student's t-test).

704 **Figure 6: HP1 and their association with TRIM28 prevent tumor development in liver.**

705 (A) Controls (n=67) and HP1-TKO (TKO, n=17) animals older than one year of age were  
706 sacrificed and the percentage of animals with tumors (morphological and histological  
707 analysis) was calculated. (B) Morphology of the livers with tumors (arrows) in three HP1-TKO  
708 females (F TKO1, 2 and 3) and three HP1-TKO males (M TKO1, 2 and 3) older than one  
709 year of age. The liver morphology of one age-matched control female and male is also  
710 shown (F Ctl and M Ctl, respectively). (C) Liver histological analysis (hematoxylin-eosin-  
711 Safran staining) of one representative HP1-TKO female (F-TKO) and one representative  
712 HP1-TKO male (M-TKO). If it is one the livers shown in (B) I would add the number (ex. M  
713 TKO1). Upper panels: tumor/liver parenchyma interface highlighted by arrowheads (low  
714 magnifications). Bottom panels: magnification (x 100) of the boxes in the upper panels  
715 showing the tumor in the right part of the images (thick plates of atypical hepatocytes). A  
716 venous tumor thrombus is also present (asterisk). Need higher magnifications or better  
717 photos because it is difficult to see anything. (D) The association between TRIM28 and  
718 HP1  $\alpha$ ,  $\beta$  and  $\gamma$  is essential in hepatocytes to prevent liver tumor development. Control  
719 (n=42), T28KO (n=32) and T28HP1box (n=30) mice older than one year of age were  
720 sacrificed and the percentage of animals with tumors (morphological and histological  
721 analysis) was calculated. (E) Liver histological analysis (hematoxylin-eosin-Safran staining)  
722 of representative animals. (F) The expression of *Bglap3* and *Mbd1* was higher also in livers  
723 from old (>1year old) HP1-TKO mice. RT-qPCR analysis was performed using RNA from old  
724 control (n=7), and HP1-TKO liver samples (TKON for normal part, TKOT for tumor part)  
725 (n=7). (G) The alteration of *Mbd1* and *Bglap3* expression upon loss of the association  
726 between TRIM28 and HP1 proteins was not maintained in old animals. RT-qPCR analysis  
727 using RNA from control (n=5), T28KO (T28KON for normal part, T28KOT for tumor part)  
728 (n=5) and T28HP1box (T28HP1boxN for normal part, T28HP1boxT for tumor part) livers  
729 (n=5). Data were normalized to *Hprt* expression and are shown as the mean  $\pm$  SEM. ns, no  
730 significant difference \*p value <0.05; \*\*p value <0.01; \*\*\*p value <0.001 (Student's t-test).

731

732

733 **TABLES:**

734 **Table 1: HP1-dependent p450 genes.**

| Gene name  | Log2 fold-change | padj     | Redox | Endoplasmic reticulum | Drug metabolism | Lipid metabolism | Steroid synthesis |
|------------|------------------|----------|-------|-----------------------|-----------------|------------------|-------------------|
| Cyp2b10    | 4.06             | 1.41E-38 | 1     | 1                     | 0               | 0                | 1                 |
| Cyp2b9     | 2.68             | 4.51E-10 | 1     | 1                     | 0               | 0                | 1                 |
| Cyp2b13    | 1.80             | 0.000120 | 0     | 0                     | 0               | 0                | 1                 |
| Cyp4f16    | 1.63             | 1.36E-09 | 0     | 0                     | 0               | 0                | 0                 |
| Cyp2d12    | 1.38             | 0.000468 | 0     | 0                     | 0               | 0                | 1                 |
| Cyp2a4     | 1.09             | 0.0342   | 0     | 0                     | 0               | 0                | 0                 |
| Cyp2a22    | 1.06             | 0.000559 | 0     | 0                     | 0               | 0                | 0                 |
| Cyp2f2     | -0.65            | 0.00318  | 1     | 1                     | 0               | 0                | 0                 |
| Cyp4f13    | -0.67            | 0.0151   | 0     | 0                     | 0               | 0                | 0                 |
| Cyp2r1     | -0.72            | 0.0173   | 1     | 1                     | 0               | 0                | 0                 |
| Cyp27a1    | -0.83            | 1.30E-05 | 1     | 0                     | 0               | 0                | 0                 |
| Cyp2d37-ps | -0.83            | 0.0319   | 0     | 0                     | 0               | 0                | 0                 |
| Cyp3a25    | -0.85            | 0.00222  | 1     | 1                     | 0               | 0                | 1                 |
| Cyp39a1    | -0.88            | 0.00164  | 1     | 1                     | 0               | 1                | 0                 |
| Cyp2e1     | -0.94            | 7.81E-05 | 1     | 1                     | 1               | 0                | 1                 |
| Cyp2d26    | -0.95            | 2.57E-05 | 1     | 1                     | 0               | 0                | 1                 |
| Cyp2a5     | -0.97            | 0.00129  | 0     | 0                     | 0               | 0                | 0                 |
| Cyp2d13    | -1.00            | 0.00445  | 0     | 0                     | 0               | 0                | 0                 |
| Cyp1a2     | -1.25            | 3.65E-12 | 1     | 1                     | 1               | 1                | 1                 |
| Cyp2c53-ps | -1.31            | 0.01178  | 0     | 0                     | 0               | 0                | 0                 |
| Cyp2d40    | -1.42            | 6.83E-06 | 0     | 0                     | 0               | 0                | 1                 |
| Cyp46a1    | -1.64            | 0.000629 | 1     | 1                     | 0               | 1                | 0                 |
| Cyp3a59    | -2.15            | 3.62E-17 | 1     | 0                     | 0               | 0                | 0                 |
| Cyp2c44    | -2.20            | 2.18E-20 | 0     | 0                     | 0               | 0                | 1                 |
| Cyp2c29    | -2.60            | 7.65E-25 | 1     | 1                     | 0               | 0                | 1                 |

735 (1) found and (0) not found according to the David Gene Ontology software.

736

737 **SUPPLEMENTARY INFORMATIONS:**

738 **Supplementary Figure 1: HP1 are not required for liver structural organization.** The  
739 absence of HP1 proteins in hepatocytes did not induce any significant histological alteration  
740 in the liver of young (7-week-old) and middle-aged (3-6-month-old) HP1-TKO mice. (A-D) low  
741 magnification, (E-H) high magnification.

742 **Supplementary Figure 2: Genome-wide distribution of HP1-dependent genes.** The  
743 distribution of HP1-dependent genes (up and down) was compared with all genes (genome)  
744 and genes detected in our RNA-seq analysis (RNA-seq).

745 **Supplementary Figure 3: HP1-TKO tumors originate from hepatocytes lacking HP1.** (A)  
746 Excision of the *Cbx1* and *Cbx3* genes in the liver of old (x-week-old) HP1-TKO mice (TKON:  
747 normal part of liver; TKOT: tumor part of liver) compared with age-matched controls (CTL).  
748 (B) Expression of the  $\alpha$ -fetoprotein (*Afp*) gene in the liver of old control (CTL) and HP1-TKO  
749 mice. (C) Quantification of Ki67-, caspase 3A- and  $\gamma$ H2AX-positive cells on liver Tissue Micro  
750 Areas of old HP1-TKO mice and age-matched controls.

751

752 **Supplementary table 1: analysis of RNAseq data comparing control and HP1-TKO liver**  
753 **total RNA**

754 **Supplementary table 2: functional clustering of genes up-regulated upon loss of HP1**  
755 **witin hepatocytes (<https://david.ncifcrf.gov/>)**

756 **Supplementary table 3: functional clustering of genes down-regulated upon loss of**  
757 **HP1 witin hepatocytes (<https://david.ncifcrf.gov/>)**

758 **Supplementary table 4: HP1-dependent genes belonging to the IFN $\gamma$  response**  
759 **pathway**

760 **Supplementary table 5: HP1-dependent genes with liver specific functions**

761 **Supplementary table 6: genes with liver-specific expression according to the Tissue**  
762 **Specific Gene Expression and Regulation software ([bioinfo.wilmer.jhu.edu/tiger](http://bioinfo.wilmer.jhu.edu/tiger))**

763 **Supplementary table 7: Fold change of HP1-dependent repeats**

764 **Supplementary table 8: repeats with increased expression upon loss of HP1**  
765 **associated with genes up-regulated upon loss of HP1**

766 **Supplementary table 9: repeats with decreased expression upon loss of HP1**  
767 **associated with genes down-regulated upon loss of HP1**

768 **Supplementary table 10: list of the oligonucleotides used in this study**

769

770

771 **REFERENCES**

772

773 Abe, K., Naruse, C., Kato, T., Nishiuchi, T., Saitou, M., and Asano, M. (2011). Loss of heterochromatin  
774 protein 1 gamma reduces the number of primordial germ cells via impaired cell cycle progression in  
775 mice. *Biol. Reprod.* *85*, 1013–1024.

776 Allan, R.S., Zueva, E., Cammas, F., Schreiber, H.A., Masson, V., Belz, G.T., Roche, D., Maison, C., Quivy,  
777 J.-P., Almouzni, G., et al. (2012). An epigenetic silencing pathway controlling T helper 2 cell lineage  
778 commitment. *Nature* *487*, 249–253.

779 Aucott, R., Bullwinkel, J., Yu, Y., Shi, W., Billur, M., Brown, J.P., Menzel, U., Kioussis, D., Wang, G.,  
780 Reisert, I., et al. (2008). HP1-beta is required for development of the cerebral neocortex and  
781 neuromuscular junctions. *J. Cell Biol.* *183*, 597–606.

782 Bhattacharyya, S., Sinha, K., and Sil, P.C. (2014). Cytochrome P450s: mechanisms and biological  
783 implications in drug metabolism and its interaction with oxidative stress. *Curr. Drug Metab.* *15*, 719–  
784 742.

785 Bojkowska, K., Aloisio, F., Cassano, M., Kapopoulou, A., Santoni de Sio, F., Zangger, N., Offner, S.,  
786 Cartoni, C., Thomas, C., Quenneville, S., et al. (2012a). Liver-specific ablation of Krüppel-associated  
787 box-associated protein 1 in mice leads to male-predominant hepatosteatosis and development of  
788 liver adenoma. *Hepatology* *56*, 1279–1290.

789 Bojkowska, K., Aloisio, F., Cassano, M., Kapopoulou, A., Santoni de Sio, F., Zangger, N., Offner, S.,  
790 Cartoni, C., Thomas, C., Quenneville, S., et al. (2012b). Liver-specific ablation of Krüppel-associated  
791 box-associated protein 1 in mice leads to male-predominant hepatosteatosis and development of  
792 liver adenoma. *Hepatology* *56*, 1279–1290.

793 Bosch-Presegué, L., Raurell-Vila, H., Thackray, J.K., González, J., Casal, C., Kane-Goldsmith, N., Vizoso,  
794 M., Brown, J.P., Gómez, A., Ausió, J., et al. (2017). Mammalian HP1 Isoforms Have Specific Roles in  
795 Heterochromatin Structure and Organization. *Cell Rep* *21*, 2048–2057.

796 Brown, J.P., Bullwinkel, J., Baron-Lühr, B., Billur, M., Schneider, P., Winking, H., and Singh, P.B. (2010).  
797 HP1gamma function is required for male germ cell survival and spermatogenesis. *Epigenetics*  
798 *Chromatin* *3*, 9.

799 Brustel, J., Kirstein, N., Izard, F., Grimaud, C., Prorok, P., Cayrou, C., Schotta, G., Abdelsamie, A.F.,  
800 Déjardin, J., Méchali, M., et al. (2017). Histone H4K20 tri-methylation at late-firing origins ensures  
801 timely heterochromatin replication. *EMBO J.* *36*, 2726–2741.

802 Cammas, F., Mark, M., Dollé, P., Dierich, A., Chambon, P., and Losson, R. (2000). Mice lacking the  
803 transcriptional corepressor TIF1beta are defective in early postimplantation development.  
804 *Development* *127*, 2955–2963.

805 Cizkova, K., Konieczna, A., Erdosova, B., Lichnovska, R., and Ehrmann, J. (2012). Peroxisome  
806 Proliferator-Activated Receptors in Regulation of Cytochromes P450: New Way to Overcome  
807 Multidrug Resistance? *J Biomed Biotechnol* *2012*.

808 Dialynas, G.K., Vitalini, M.W., and Wallrath, L.L. (2008). Linking Heterochromatin Protein 1 (HP1) to  
809 cancer progression. *Mutat. Res.* *647*, 13–20.



- 810 Dinant, C., and Luijsterburg, M.S. (2009). The emerging role of HP1 in the DNA damage response.  
811 *Mol. Cell. Biol.* *29*, 6335–6340.
- 812 Du, Q., Bert, S.A., Armstrong, N.J., Caldon, C.E., Song, J.Z., Nair, S.S., Gould, C.M., Luu, P.-L., Peters, T.,  
813 Khoury, A., et al. (2019). Replication timing and epigenome remodelling are associated with the  
814 nature of chromosomal rearrangements in cancer. *Nat Commun* *10*, 416.
- 815 Ecco, G., Cassano, M., Kauzlaric, A., Duc, J., Coluccio, A., Offner, S., Imbeault, M., Rowe, H.M., Turelli,  
816 P., and Trono, D. (2016). Transposable Elements and Their KRAB-ZFP Controllers Regulate Gene  
817 Expression in Adult Tissues. *Dev. Cell* *36*, 611–623.
- 818 Eissenberg, J.C., and Elgin, S.C.R. (2014). HP1a: a structural chromosomal protein regulating  
819 transcription. *Trends Genet.* *30*, 103–110.
- 820 Eissenberg, J.C., Morris, G.D., Reuter, G., and Hartnett, T. (1992). The heterochromatin-associated  
821 protein HP-1 is an essential protein in *Drosophila* with dosage-dependent effects on position-effect  
822 variegation. *Genetics* *131*, 345–352.
- 823 Fan, D.N.-Y., Tsang, F.H.-C., Tam, A.H.-K., Au, S.L.-K., Wong, C.C.-L., Wei, L., Lee, J.M.-F., He, X., Ng,  
824 I.O.-L., and Wong, C.-M. (2013). Histone lysine methyltransferase, suppressor of variegation 3-9  
825 homolog 1, promotes hepatocellular carcinoma progression and is negatively regulated by  
826 microRNA-125b. *Hepatology* *57*, 637–647.
- 827 Fanti, L., and Pimpinelli, S. (2008). HP1: a functionally multifaceted protein. *Curr. Opin. Genet. Dev.*  
828 *18*, 169–174.
- 829 Fausto, N., Campbell, J.S., and Riehle, K.J. (2006). Liver regeneration. *Hepatology* *43*, S45-53.
- 830 Guengerich, F.P. (2018). Cytochrome P450 research and The Journal of Biological Chemistry. *J. Biol.*  
831 *Chem.*
- 832 Hardy, T., and Mann, D.A. (2016). Epigenetics in liver disease: from biology to therapeutics. *Gut* *65*,  
833 1895–1905.
- 834 Herquel, B., Ouararhni, K., Khetchoumian, K., Ignat, M., Teletin, M., Mark, M., Béchade, G., Van  
835 Dorselaer, A., Sanglier-Cianféron, S., Hamiche, A., et al. (2011). Transcription cofactors TRIM24,  
836 TRIM28, and TRIM33 associate to form regulatory complexes that suppress murine hepatocellular  
837 carcinoma. *Proc. Natl. Acad. Sci. U.S.A.* *108*, 8212–8217.
- 838 Herquel, B., Ouararhni, K., Martianov, I., Le Gras, S., Ye, T., Keime, C., Lerouge, T., Jost, B., Cammas,  
839 F., Losson, R., et al. (2013). Trim24-repressed VL30 retrotransposons regulate gene expression by  
840 producing noncoding RNA. *Nat. Struct. Mol. Biol.* *20*, 339–346.
- 841 Herzog, M., Wendling, O., Guillou, F., Chambon, P., Mark, M., Losson, R., and Cammas, F. (2011).  
842 TIF1 $\beta$  association with HP1 is essential for post-gastrulation development, but not for Sertoli cell  
843 functions during spermatogenesis. *Dev. Biol.* *350*, 548–558.
- 844 Hochberg, Y., and Benjamini, Y. (1990). More powerful procedures for multiple significance testing.  
845 *Stat Med* *9*, 811–818.
- 846 Huang, C., Su, T., Xue, Y., Cheng, C., Lay, F.D., McKee, R.A., Li, M., Vashisht, A., Wohlschlegel, J.,  
847 Novitsch, B.G., et al. (2017). Cbx3 maintains lineage specificity during neural differentiation. *Genes*  
848 *Dev.* *31*, 241–246.

- 849 Jacobs, F.M.J., Greenberg, D., Nguyen, N., Haeussler, M., Ewing, A.D., Katzman, S., Paten, B., Salama,  
850 S.R., and Haussler, D. (2014). An evolutionary arms race between KRAB zinc-finger genes ZNF91/93  
851 and SVA/L1 retrotransposons. *Nature* 516, 242–245.
- 852 James, T.C., and Elgin, S.C. (1986). Identification of a nonhistone chromosomal protein associated  
853 with heterochromatin in *Drosophila melanogaster* and its gene. *Mol. Cell. Biol.* 6, 3862–3872.
- 854 Janssen, A., Colmenares, S.U., and Karpen, G.H. (2018a). Heterochromatin: Guardian of the Genome.  
855 *Annu. Rev. Cell Dev. Biol.*
- 856 Janssen, A., Colmenares, S.U., and Karpen, G.H. (2018b). Heterochromatin: Guardian of the Genome.  
857 *Annu. Rev. Cell Dev. Biol.*
- 858 Jørgensen, S., Schotta, G., and Sørensen, C.S. (2013). Histone H4 lysine 20 methylation: key player in  
859 epigenetic regulation of genomic integrity. *Nucleic Acids Res.* 41, 2797–2806.
- 860 Khetchoumian, K., Teletin, M., Tisserand, J., Mark, M., Herquel, B., Ignat, M., Zucman-Rossi, J.,  
861 Cammas, F., Lerouge, T., Thibault, C., et al. (2007). Loss of Trim24 (Tif1alpha) gene function confers  
862 oncogenic activity to retinoic acid receptor alpha. *Nat. Genet.* 39, 1500–1506.
- 863 Koschmann, C., Nunez, F.J., Mendez, F., Brosnan-Cashman, J.A., Meeker, A.K., Lowenstein, P.R., and  
864 Castro, M.G. (2017). Mutated Chromatin Regulatory Factors as Tumor Drivers in Cancer. *Cancer Res.*  
865 77, 227–233.
- 866 Kuo, L.J., and Yang, L.-X. (2008). Gamma-H2AX - a novel biomarker for DNA double-strand breaks. In  
867 *Vivo* 22, 305–309.
- 868 Kurinna, S., and Barton, M.C. (2011). Cascades of transcription regulation during liver regeneration.  
869 *Int. J. Biochem. Cell Biol.* 43, 189–197.
- 870 Kwon, S.H., and Workman, J.L. (2011). The changing faces of HP1: From heterochromatin formation  
871 and gene silencing to euchromatic gene expression: HP1 acts as a positive regulator of transcription.  
872 *Bioessays* 33, 280–289.
- 873 Lee, D.H., Li, Y., Shin, D.-H., Yi, S.A., Bang, S.-Y., Park, E.K., Han, J.-W., and Kwon, S.H. (2013). DNA  
874 microarray profiling of genes differentially regulated by three heterochromatin protein 1 (HP1)  
875 homologs in *Drosophila*. *Biochem. Biophys. Res. Commun.* 434, 820–828.
- 876 Lehnertz, B., Ueda, Y., Derijck, A.A.H.A., Braunschweig, U., Perez-Burgos, L., Kubicek, S., Chen, T., Li,  
877 E., Jenuwein, T., and Peters, A.H.F.M. (2003). Suv39h-mediated histone H3 lysine 9 methylation  
878 directs DNA methylation to major satellite repeats at pericentric heterochromatin. *Curr. Biol.* 13,  
879 1192–1200.
- 880 Lomberk, G., Wallrath, L., and Urrutia, R. (2006). The Heterochromatin Protein 1 family. *Genome Biol.*  
881 7, 228.
- 882 Love, M.I., Huber, W., and Anders, S. (2014). Moderated estimation of fold change and dispersion for  
883 RNA-seq data with DESeq2. *Genome Biol.* 15, 550.
- 884 Mai, S. (2018). The 3D Cancer Nucleus. *Genes Chromosomes Cancer*.

- 885 Maksakova, I.A., Goyal, P., Bullwinkel, J., Brown, J.P., Bilenky, M., Mager, D.L., Singh, P.B., and  
886 Lorincz, M.C. (2011). H3K9me3-binding proteins are dispensable for SETDB1/H3K9me3-dependent  
887 retroviral silencing. *Epigenetics Chromatin* 4, 12.
- 888 Mattout, A., Aaronson, Y., Sailaja, B.S., Raghu Ram, E.V., Harikumar, A., Mallm, J.-P., Sim, K.H.,  
889 Nissim-Rafinia, M., Supper, E., Singh, P.B., et al. (2015). Heterochromatin Protein 1 $\beta$  (HP1 $\beta$ ) has  
890 distinct functions and distinct nuclear distribution in pluripotent versus differentiated cells. *Genome*  
891 *Biol* 16.
- 892 Mirabella, A.C., Foster, B.M., and Bartke, T. (2016). Chromatin deregulation in disease. *Chromosoma*  
893 125, 75–93.
- 894 Nishibuchi, G., and Nakayama, J. (2014). Biochemical and structural properties of heterochromatin  
895 protein 1: understanding its role in chromatin assembly. *J. Biochem.* 156, 11–20.
- 896 O’Geen, H., Squazzo, S.L., Iyengar, S., Blahnik, K., Rinn, J.L., Chang, H.Y., Green, R., and Farnham, P.J.  
897 (2007). Genome-wide analysis of KAP1 binding suggests autoregulation of KRAB-ZNFs. *PLoS Genet.* 3,  
898 e89.
- 899 Paik, Y.-H., Kim, J., Aoyama, T., De Minicis, S., Bataller, R., and Brenner, D.A. (2014). Role of NADPH  
900 oxidases in liver fibrosis. *Antioxid. Redox Signal.* 20, 2854–2872.
- 901 Park, J.W., Reed, J.R., Brignac-Huber, L.M., and Backes, W.L. (2014). Cytochrome P450 system  
902 proteins reside in different regions of the endoplasmic reticulum. *Biochem. J.* 464, 241–249.
- 903 Piacentini, L., Fanti, L., Negri, R., Del Vescovo, V., Fatica, A., Altieri, F., and Pimpinelli, S. (2009).  
904 Heterochromatin protein 1 (HP1a) positively regulates euchromatic gene expression through RNA  
905 transcript association and interaction with hnRNPs in *Drosophila*. *PLoS Genet.* 5, e1000670.
- 906 Pogribny, I.P., Ross, S.A., Tryndyak, V.P., Pogribna, M., Poirier, L.A., and Karpinets, T.V. (2006).  
907 Histone H3 lysine 9 and H4 lysine 20 trimethylation and the expression of Suv4-20h2 and Suv-39h1  
908 histone methyltransferases in hepatocarcinogenesis induced by methyl deficiency in rats.  
909 *Carcinogenesis* 27, 1180–1186.
- 910 Postic, C., Shiota, M., Niswender, K.D., Jetton, T.L., Chen, Y., Moates, J.M., Shelton, K.D., Lindner, J.,  
911 Cherrington, A.D., and Magnuson, M.A. (1999). Dual roles for glucokinase in glucose homeostasis as  
912 determined by liver and pancreatic beta cell-specific gene knock-outs using Cre recombinase. *J. Biol.*  
913 *Chem.* 274, 305–315.
- 914 Prakash, K., and Fournier, D. (2018). Evidence for the implication of the histone code in building the  
915 genome structure. *BioSystems* 164, 49–59.
- 916 Scarfò, I., Pellegrino, E., Mereu, E., Inghirami, G., and Piva, R. (2016). Transposable elements: The  
917 enemies within. *Experimental Hematology* 44, 913–916.
- 918 Schott, S., Coustham, V., Simonet, T., Bedet, C., and Palladino, F. (2006). Unique and redundant  
919 functions of *C. elegans* HP1 proteins in post-embryonic development. *Dev. Biol.* 298, 176–187.
- 920 Shi, S., Larson, K., Guo, D., Lim, S.J., Dutta, P., Yan, S.-J., and Li, W.X. (2008). *Drosophila* STAT is  
921 required for directly maintaining HP1 localization and heterochromatin stability. *Nat. Cell Biol.* 10,  
922 489–496.

- 923 Si-Tayeb, K., Lemaigre, F.P., and Duncan, S.A. (2010). Organogenesis and development of the liver.  
924 *Dev. Cell* 18, 175–189.
- 925 Strick-Marchand, H., and Weiss, M.C. (2002). Inducible differentiation and morphogenesis of  
926 bipotential liver cell lines from wild-type mouse embryos. *Hepatology* 36, 794–804.
- 927 Takaki, A., and Yamamoto, K. (2015). Control of oxidative stress in hepatocellular carcinoma: Helpful  
928 or harmful? *World J Hepatol* 7, 968–979.
- 929 Thompson, P.J., Macfarlan, T.S., and Lorincz, M.C. (2016). Long Terminal Repeats: From Parasitic  
930 Elements to Building Blocks of the Transcriptional Regulatory Repertoire. *Mol. Cell* 62, 766–776.
- 931 Vad-Nielsen, J., and Nielsen, A.L. (2015). Beyond the histone tale: HP1 $\alpha$  deregulation in breast cancer  
932 epigenetics. *Cancer Biology & Therapy* 16, 189–200.
- 933 Vakoc, C.R., Mandat, S.A., Olenchock, B.A., and Blobel, G.A. (2005). Histone H3 lysine 9 methylation  
934 and HP1 $\gamma$  are associated with transcription elongation through mammalian chromatin. *Mol.*  
935 *Cell* 19, 381–391.
- 936 Velazquez Camacho, O., Galan, C., Swist-Rosowska, K., Ching, R., Gamalinda, M., Karabiber, F., De La  
937 Rosa-Velazquez, I., Engist, B., Koschorz, B., Shukeir, N., et al. (2017). Major satellite repeat RNA  
938 stabilize heterochromatin retention of Suv39h enzymes by RNA-nucleosome association and  
939 RNA:DNA hybrid formation. *Elife* 6.
- 940 Weisend, C.M., Kundert, J.A., Suvorova, E.S., Prigge, J.R., and Schmidt, E.E. (2009). Cre activity in fetal  
941 albCre mouse hepatocytes: Utility for developmental studies. *Genesis* 47, 789–792.
- 942 Wolf, G., Yang, P., Füchtbauer, A.C., Füchtbauer, E.-M., Silva, A.M., Park, C., Wu, W., Nielsen, A.L.,  
943 Pedersen, F.S., and Macfarlan, T.S. (2015). The KRAB zinc finger protein ZFP809 is required to initiate  
944 epigenetic silencing of endogenous retroviruses. *Genes Dev.* 29, 538–554.
- 945 Yang, P., Wang, Y., and Macfarlan, T.S. (2017). The Role of KRAB-ZFPs in Transposable Element  
946 Repression and Mammalian Evolution. *Trends Genet.* 33, 871–881.
- 947
- 948
- 949

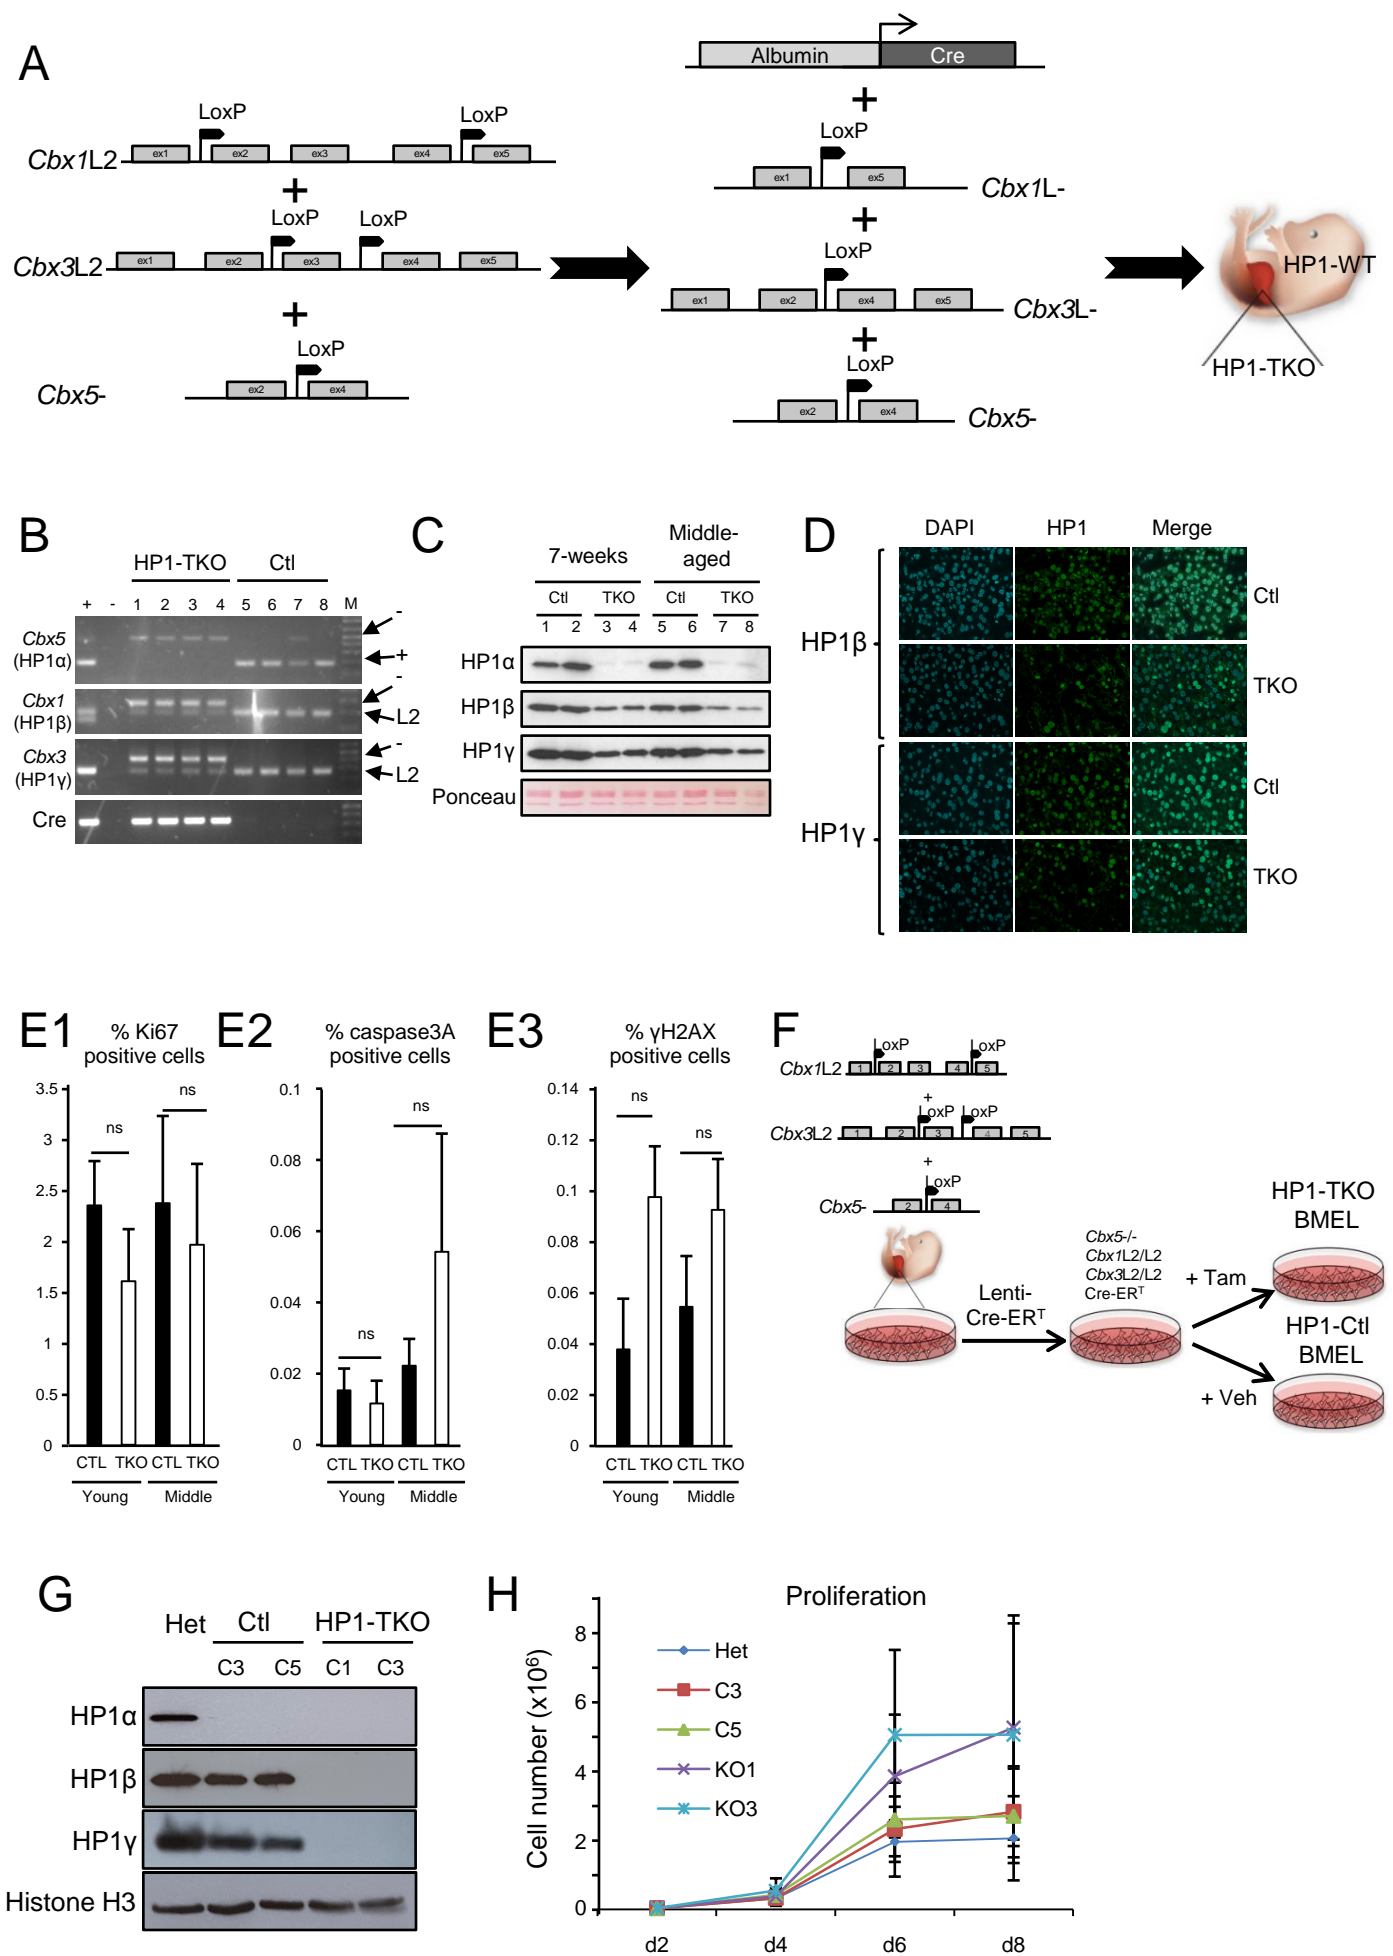

Figure 1. Saksouk & Hajdari et al.

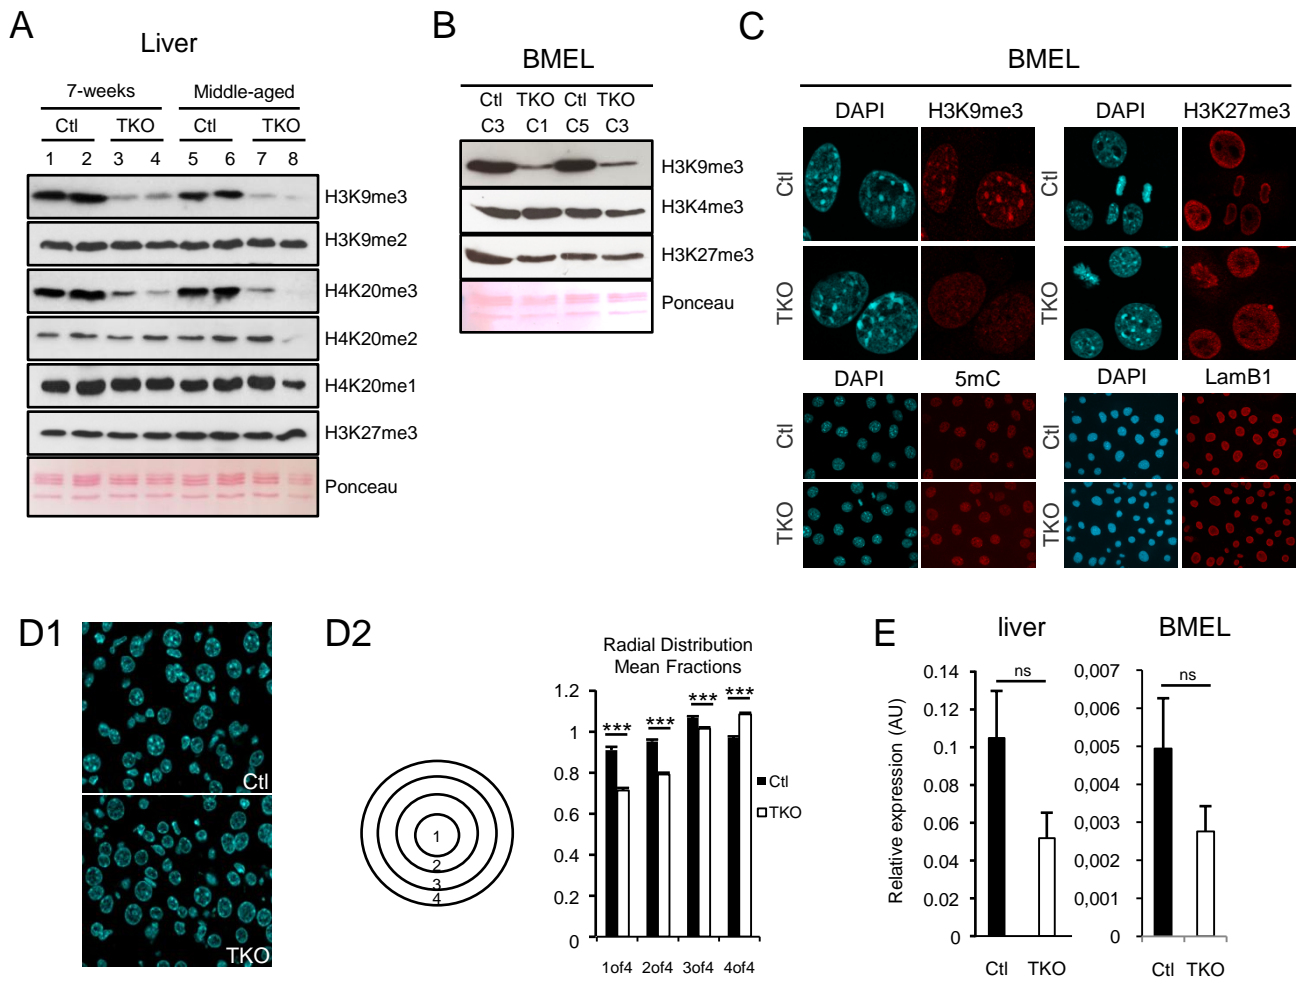

Figure 2 Saksouk & Hajdari et al,

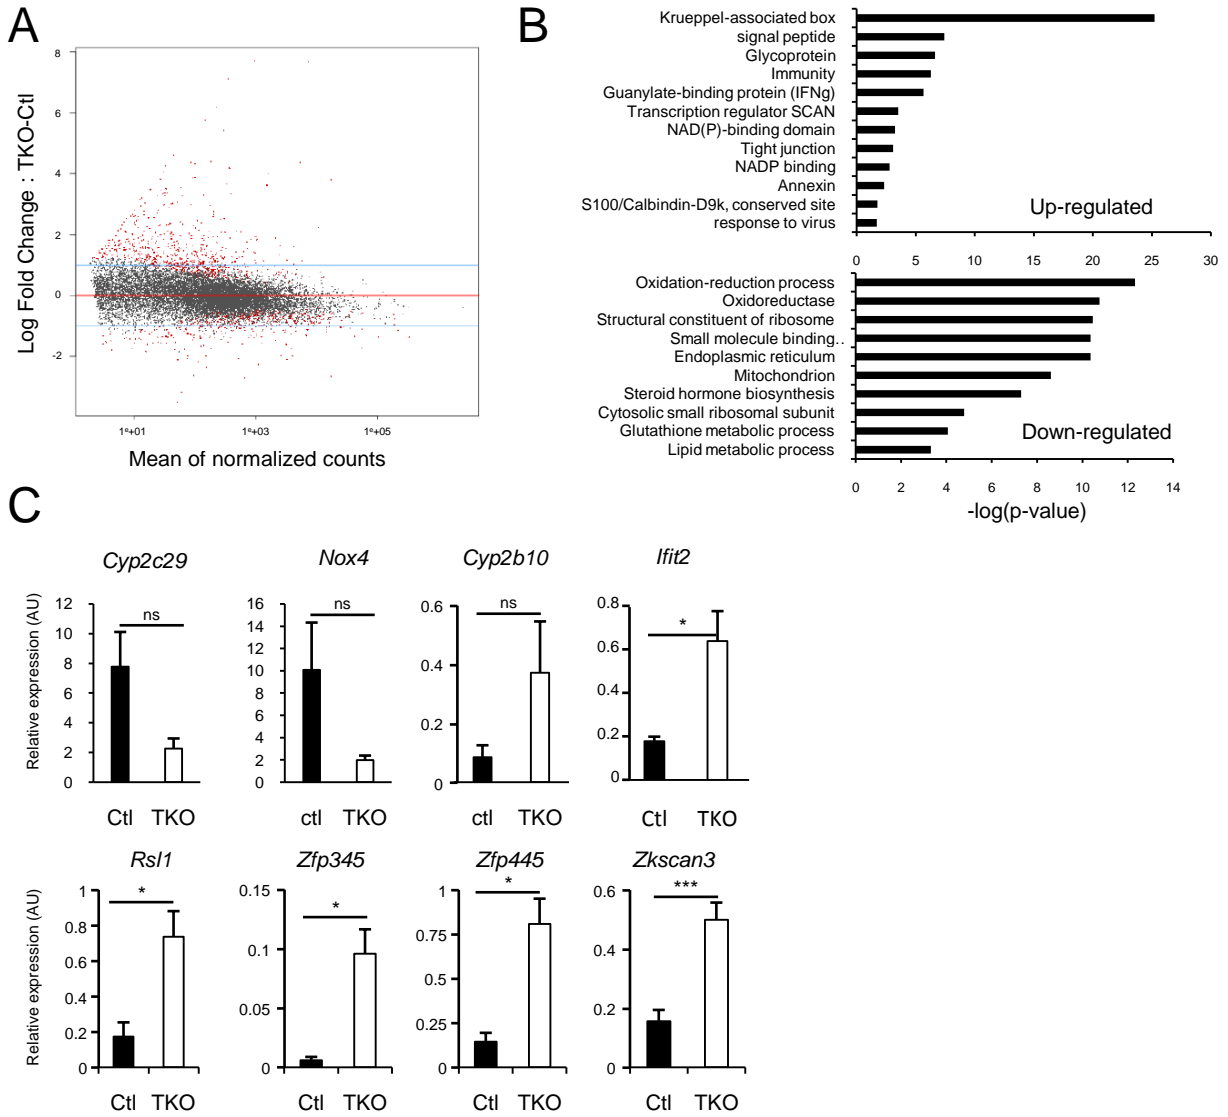

Figure 3 Saksouk & Hajdari et al,

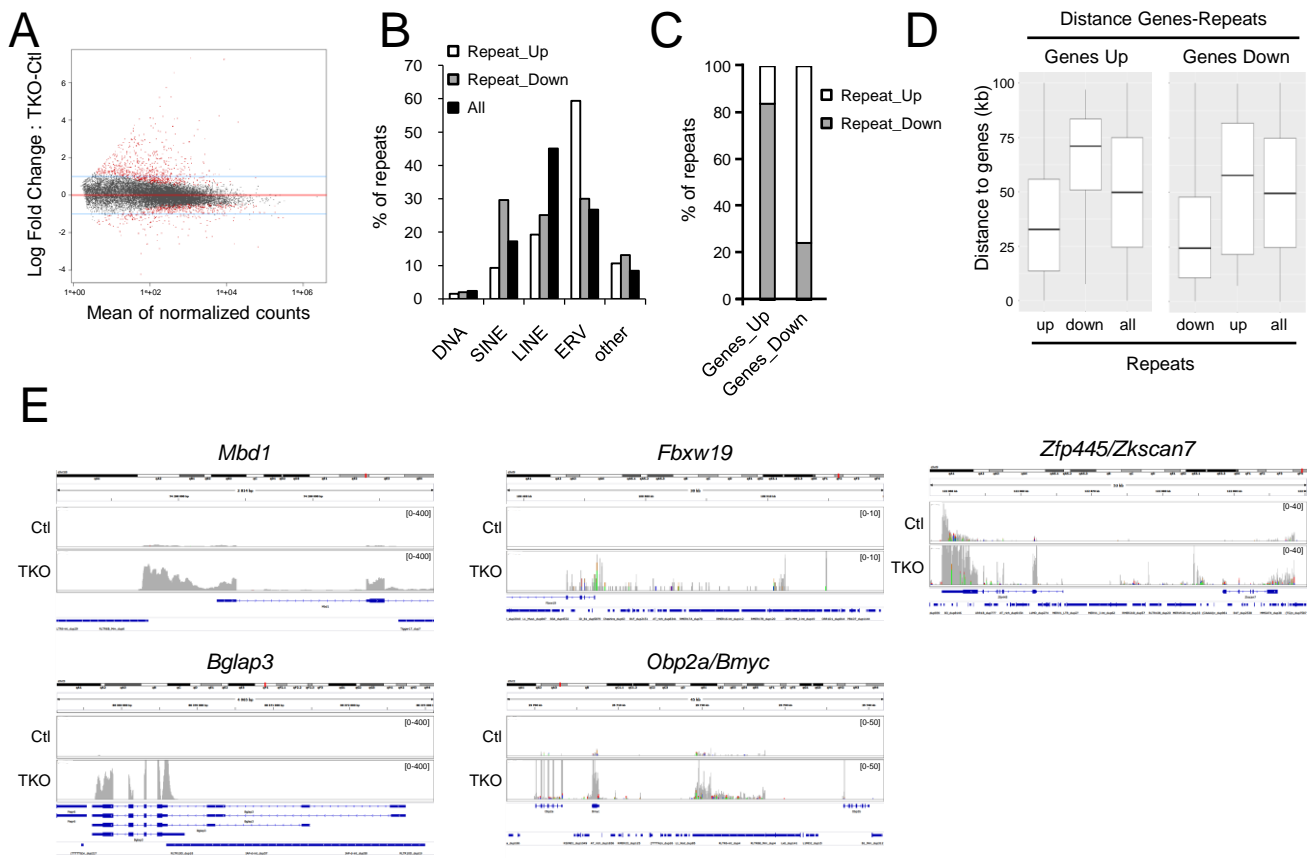

Figure 4 Saksouk & Hajdari et al,



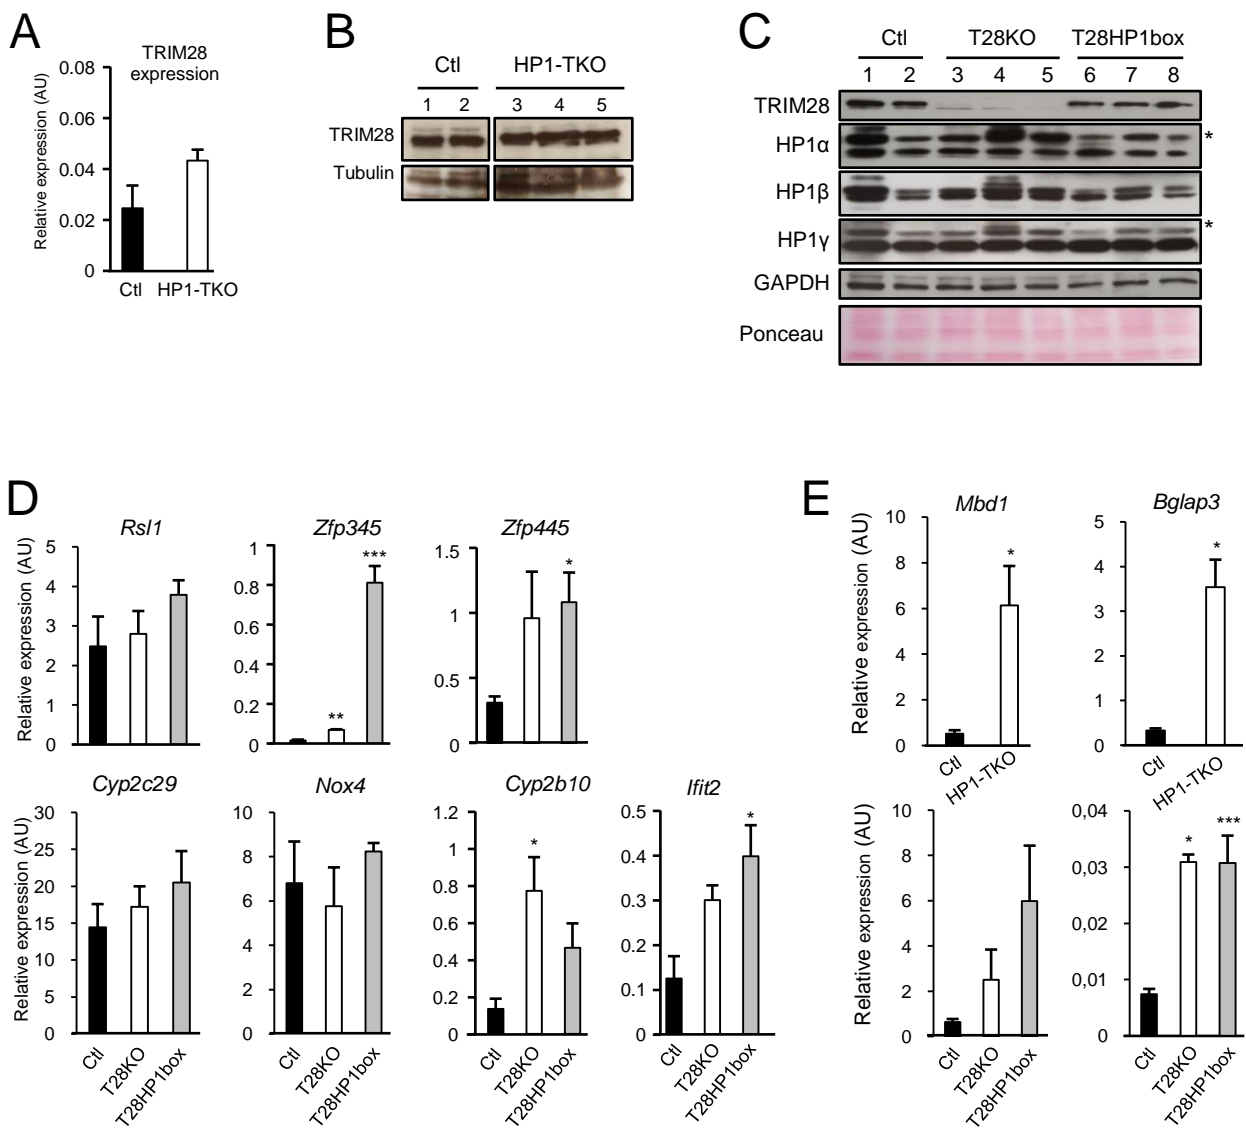

Figure 5, Saksouk & Hajdari et al,

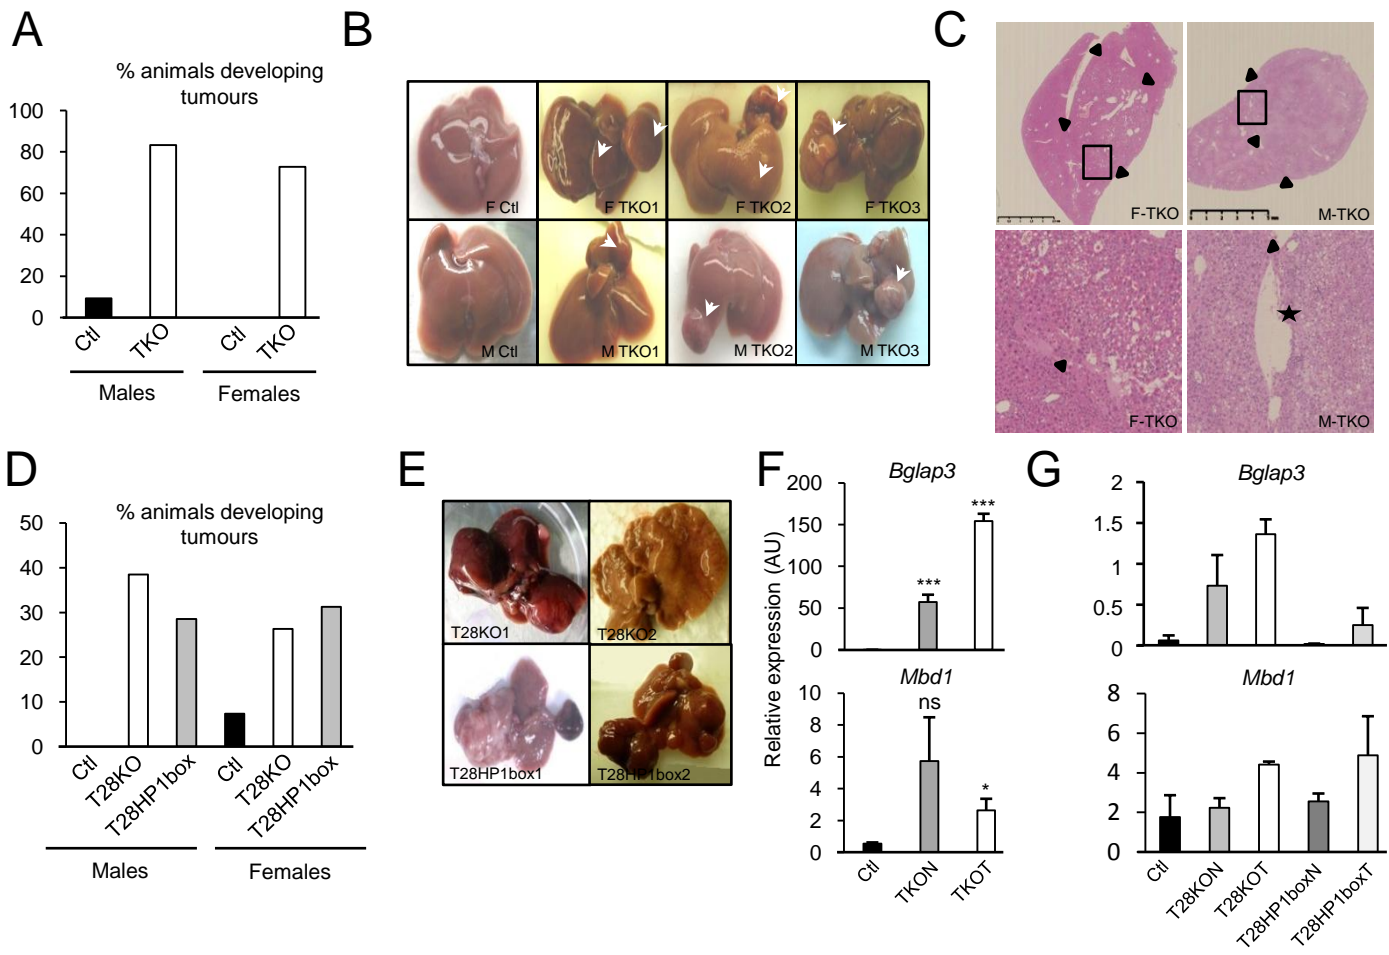

Figure 6 Saksouk & Hajdari et al,

Table 1: HP1-dependent p450 genes.

| Gene name  | Log2 fold-change | padj     | Redox | Endoplasmic reticulum | Drug metabolism | Lipid metabolism | Steroid synthesis |
|------------|------------------|----------|-------|-----------------------|-----------------|------------------|-------------------|
| Cyp2b10    | 4.06             | 1.41E-38 | 1     | 1                     | 0               | 0                | 1                 |
| Cyp2b9     | 2.68             | 4.51E-10 | 1     | 1                     | 0               | 0                | 1                 |
| Cyp2b13    | 1.80             | 0.000120 | 0     | 0                     | 0               | 0                | 1                 |
| Cyp4f16    | 1.63             | 1.36E-09 | 0     | 0                     | 0               | 0                | 0                 |
| Cyp2d12    | 1.38             | 0.000468 | 0     | 0                     | 0               | 0                | 1                 |
| Cyp2a4     | 1.09             | 0.0342   | 0     | 0                     | 0               | 0                | 0                 |
| Cyp2a22    | 1.06             | 0.000559 | 0     | 0                     | 0               | 0                | 0                 |
| Cyp2f2     | -0.65            | 0.00318  | 1     | 1                     | 0               | 0                | 0                 |
| Cyp4f13    | -0.67            | 0.0151   | 0     | 0                     | 0               | 0                | 0                 |
| Cyp2r1     | -0.72            | 0.0173   | 1     | 1                     | 0               | 0                | 0                 |
| Cyp27a1    | -0.83            | 1.30E-05 | 1     | 0                     | 0               | 0                | 0                 |
| Cyp2d37-ps | -0.83            | 0.0319   | 0     | 0                     | 0               | 0                | 0                 |
| Cyp3a25    | -0.85            | 0.00222  | 1     | 1                     | 0               | 0                | 1                 |
| Cyp39a1    | -0.88            | 0.00164  | 1     | 1                     | 0               | 1                | 0                 |
| Cyp2e1     | -0.94            | 7.81E-05 | 1     | 1                     | 1               | 0                | 1                 |
| Cyp2d26    | -0.95            | 2.57E-05 | 1     | 1                     | 0               | 0                | 1                 |
| Cyp2a5     | -0.97            | 0.00129  | 0     | 0                     | 0               | 0                | 0                 |
| Cyp2d13    | -1.00            | 0.00445  | 0     | 0                     | 0               | 0                | 0                 |
| Cyp1a2     | -1.25            | 3.65E-12 | 1     | 1                     | 1               | 1                | 1                 |
| Cyp2c53-ps | -1.31            | 0.01178  | 0     | 0                     | 0               | 0                | 0                 |
| Cyp2d40    | -1.42            | 6.83E-06 | 0     | 0                     | 0               | 0                | 1                 |
| Cyp46a1    | -1.64            | 0.000629 | 1     | 1                     | 0               | 1                | 0                 |
| Cyp3a59    | -2.15            | 3.62E-17 | 1     | 0                     | 0               | 0                | 0                 |
| Cyp2c44    | -2.20            | 2.18E-20 | 0     | 0                     | 0               | 0                | 1                 |
| Cyp2c29    | -2.60            | 7.65E-25 | 1     | 1                     | 0               | 0                | 1                 |

(1) found and (0) not found according to the David Gene Ontology software.
